# Supplementary material for: Genetic analyses implicate complex links between adult testosterone levels and health and disease
Source: Springer Nature journal article supplement (doi:10.1038/s43856-022-00226-0), 2023-01-18
Supplement: MOESM14 [file 43856_2022_226_MOESM14_ESM.pdf]

## Supplementary Figures and Legends

**Supplementary Figure 1. Results from tissue enrichment analyses from MAGMA implemented in FUMA**

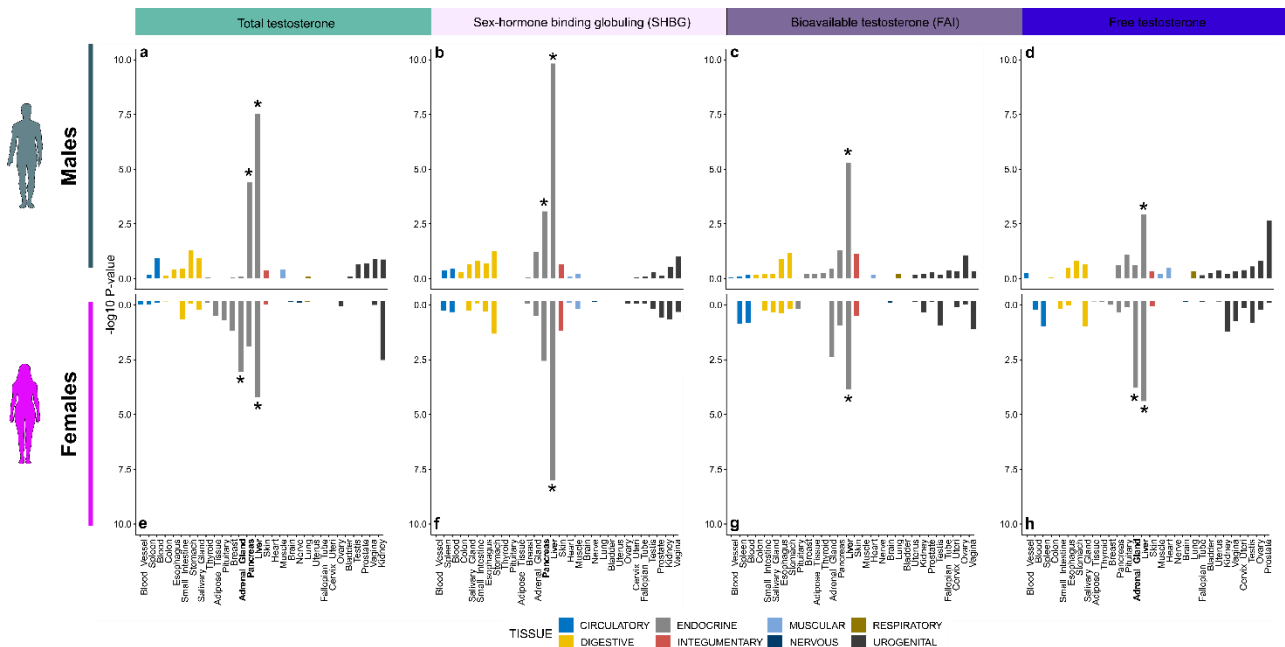

Panels **a-d** show tissue enrichment in males, and **e-h** in females. Green = total testosterone, white lilac = SHBG, grey = free androgen index (FAI), blue = free testosterone. The GTEx tissues shown in figure have been group based on tissue types, with code for tissue colors available in the figure. Based on the UK Biobank GWAS, a large proportion of the genes residing in the GWAS loci are preferably expressed in the liver. This applies to all studied traits. Interestingly, we simultaneously detected no evidence for the GWAS loci being enriched for genes expressed in the testis or the ovaries, the tissues responsible for the bulk of T production. Potentially, this can be a sign that at population level, individual differences in T metabolism may have larger effects on adult serum T levels than genetic differences in the tissues responsible for T production. Especially for males it seems thus possible that T production may not be the rate-limiting step for T levels. However, the situation may be slightly different in females, where adrenal gland is a major site for T production, and many genes in the loci associated with total and free T in females appeared preferably expressed in this tissue. Underscoring the close relationship between metabolism and T levels, pancreas also shows up as a tissue enriched for the GWAS signals for total T and SHBG in males.

## Supplementary Figure 2. Visualisation of results from KEGG pathway analyses in FUMA

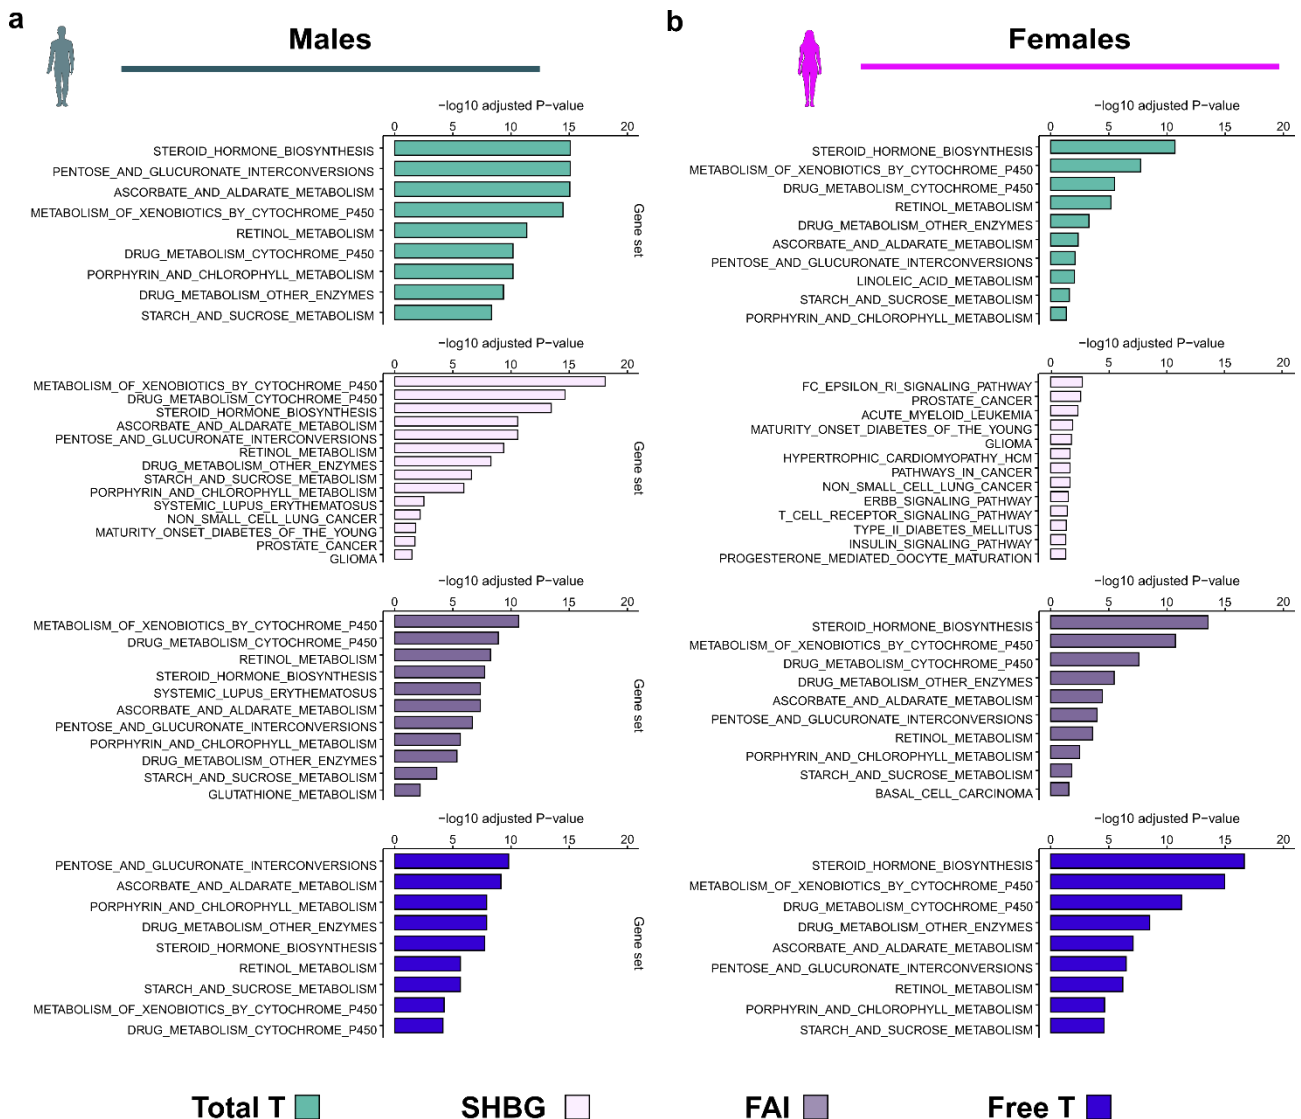

The figure illustrates Kyoto Encyclopedia of Genes and Genomes (KEGG) pathways showing enrichment for the genes residing in the GWAS loci. Panel **a** shows the results for males, and **b** for females. Green = enriched pathways for total testosterone, white lilac = SHBG, grey = free androgen index (FAI), blue = free testosterone. These results are based on statistically significant enrichment on KEGG pathways, after adjusting for multiple testing in FUMA (Supplementary Table 10). The GWAS loci show clear enrichment for genes that affect steroid hormone biosynthesis, various metabolic pathways and metabolite excretion. Overall these results highlight that the genetic variation detected in the GWASs relates to many molecular pathways that are known to be crucial for T and SHBG processing and regulation. Importantly, these results also underscore that no single pathway dominates T regulation, but that genetic regulation of T levels in the human body likely results from simultaneous and combined action of many molecular processes. Notably, the results support the observations from the tissue enrichment analyses, emphasizing the significance of T metabolism (for which the major site of action is

liver) to T levels, likely via specific and unspecific mechanisms. T=Testosterone, SHBG = Sex-hormone binding globulin, FAI = Free androgen index, Free T = calculated free testosterone.

### Supplementary Figure 3. Correlation between testosterone levels ~5 years apart for a subset of UK Biobank participants

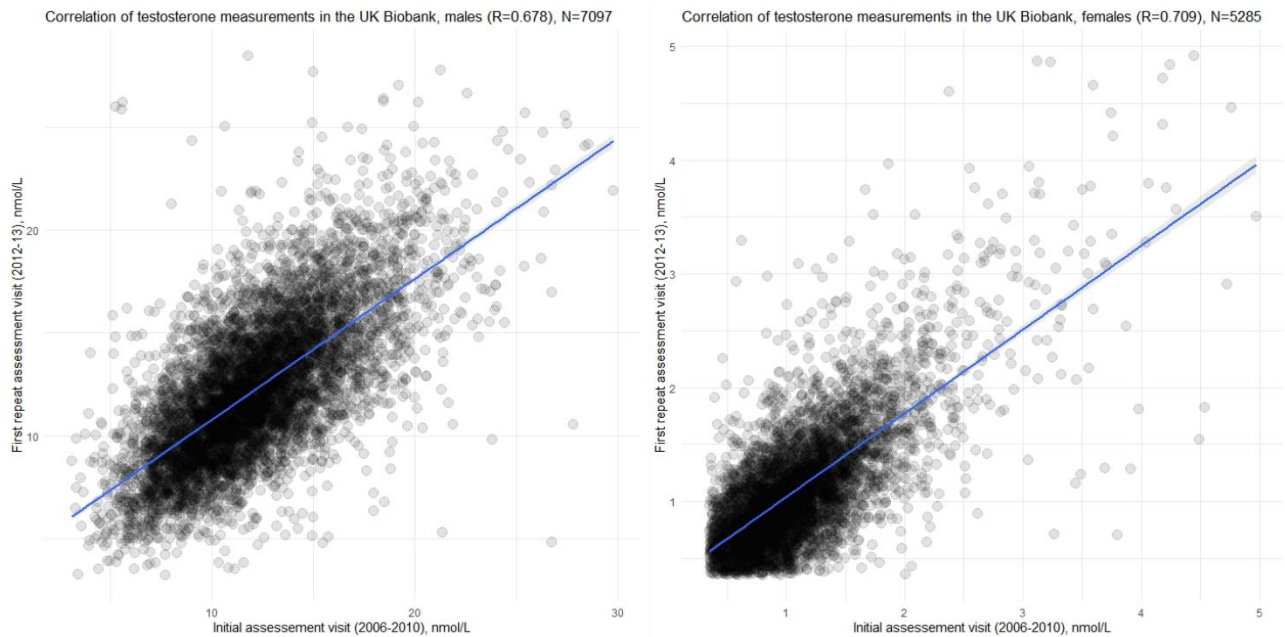

For both men (N=7,097) and women (N=5,285), testosterone (T) measurements from roughly five years apart are highly correlated (R=0.678 in men, R=0.709 in women) in the UK Biobank. The grey circles indicate individual measurements at time point 1 (original visit, x-axis) vs. time point 2 (repeat assessment, y-axis). The high correlations of T measurements between the two distinct time points provide strong evidence that the immunohistochemical method used reliably captures population-level variability in T levels. These correlations support also the concept that there exists a fairly stable individual-level baseline for T, known to be largely heritable in basis, reflecting an individual's life-long T exposure. Further supporting such a baseline for T levels, measurement at the first visit, several years prior the second, predicts T level at the second visit considerably better than for instance BMI from the current visit (Supplementary Figure 10). For visual purposes, the individuals with a likely medical condition leading to extremely low or high testosterone (<3 in men and >5 in women) were removed from the plots.

**Supplementary Figure 4. Genetic correlation results between the studied testosterone traits**

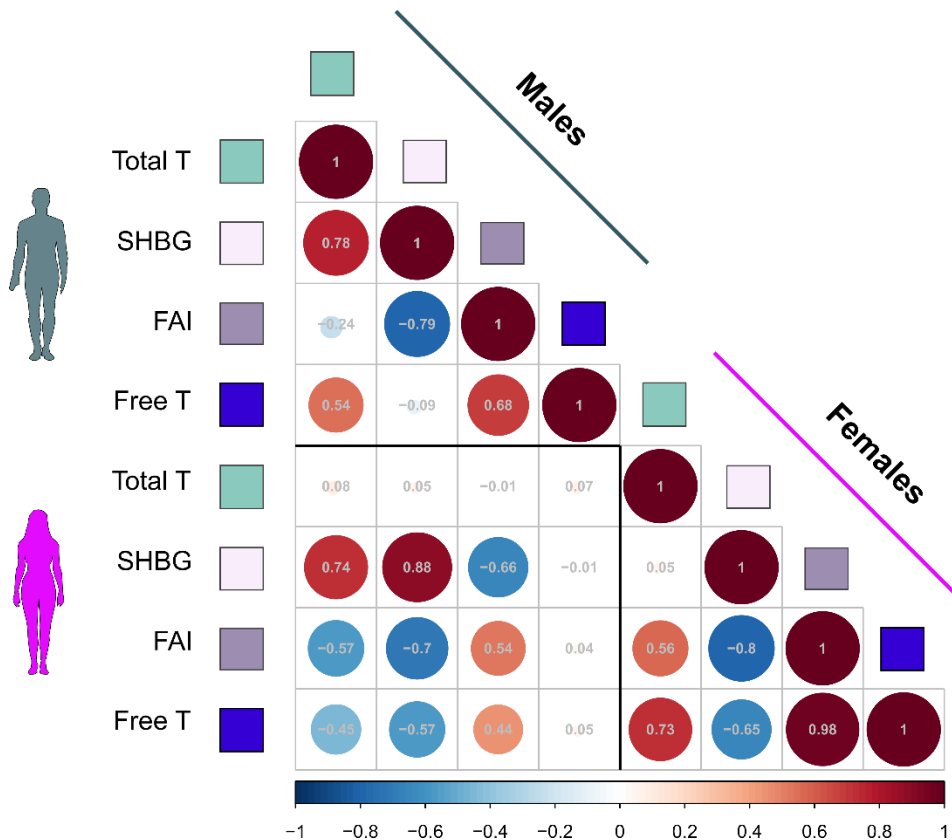

The figure shows genetic correlations based on LDSC analyses for males (area next to dark green symbol), females (pink) and over both sexes (bottom left corner surrounded by black lines in the correlation grid). Green = total testosterone, white lilac = SHBG, grey = free androgen index (FAI), blue = free testosterone. In line with recent findings, we observed only a very weak genetic correlation for total T levels between males and females ( $r_g=0.08$ ,  $p=0.063$ ). Similarly, free T showed low genetic correlation estimate between the sexes ( $r_g=0.05$ ,  $p=0.102$ ). This supports the concept that uniquely among complex traits, T levels are determined by distinct heritable factors in males and females, echoing results from earlier twin studies (20). In contrast, the genetic correlation for males and females SHBG was high ( $r_g=0.88$ ,  $p=9.7e-197$ ), and for FAI intermediate ( $r_g=0.57$ ,  $p=5.8e-26$ ), suggesting that similar genetic factors contribute to these traits in both sexes. Moreover, consistent with epidemiological observations that total T and SHBG levels are correlated in males, these traits showed a robust positive genetic correlation ( $r_g=0.78$ ,  $p=1.0e-127$ ). This observation supports the concept that under normal physiological conditions, based on homeostatic feedback SHBG levels increase when T increases and vice versa. At the same time, under the premise of unbound T being biologically the most potent form of T, this suggests that some genetic variants affecting total T in men do not necessarily reflect increased T activity. Yet, for females such connection between

total T and SHBG did not exist ( $r_g=0.05$ ,  $p=0.207$ ), suggesting such feedback mechanism is not active in females, and that total T levels in females may be more closely related to T action than total T levels in males.

### Supplementary Figure 5. Predictive ability of total T and free T PGSs for T levels in the UK Biobank

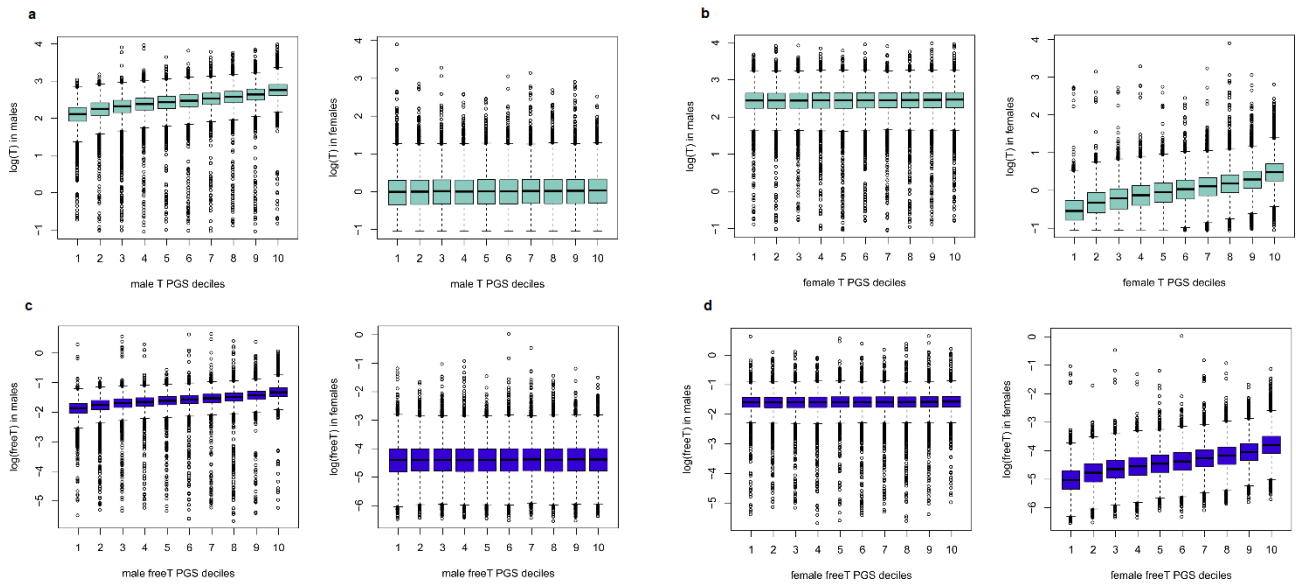

The figure shows how the sex-specific PGS correlates highly with T levels within the sex it was constructed, and has drastically limited predictive ability in the opposite sex. **a** Total T PGS vs T in men, **b** Total T PGS vs T in women, **c** Free T PGS in men, **d** Free T PGS in women. The box plots show median (black line), lower and upper quartiles (colored area of the box) for log T and free T per PGS decile (1=persons with T PGS in the lowest 10%, 10 = persons with T PGS higher than for 90% of the samples), and the error bars indicate 5% and 95% quantiles. Green boxplots = total testosterone values by PGS decile, blue = free testosterone values by PGS decile. Although the cross-sex comparisons in UK Biobank are performed using independent datasets (men vs. women, based on data from 159,110 unrelated men and 184,573 unrelated women with white British ancestry), please note that the training (PGS calculation) and the test (explained variance) datasets for the sex-specific PGSs include the same individuals from the UK Biobank, leading to inflated results.

**Supplementary Figure 6. PGS associations in the FinnGen**

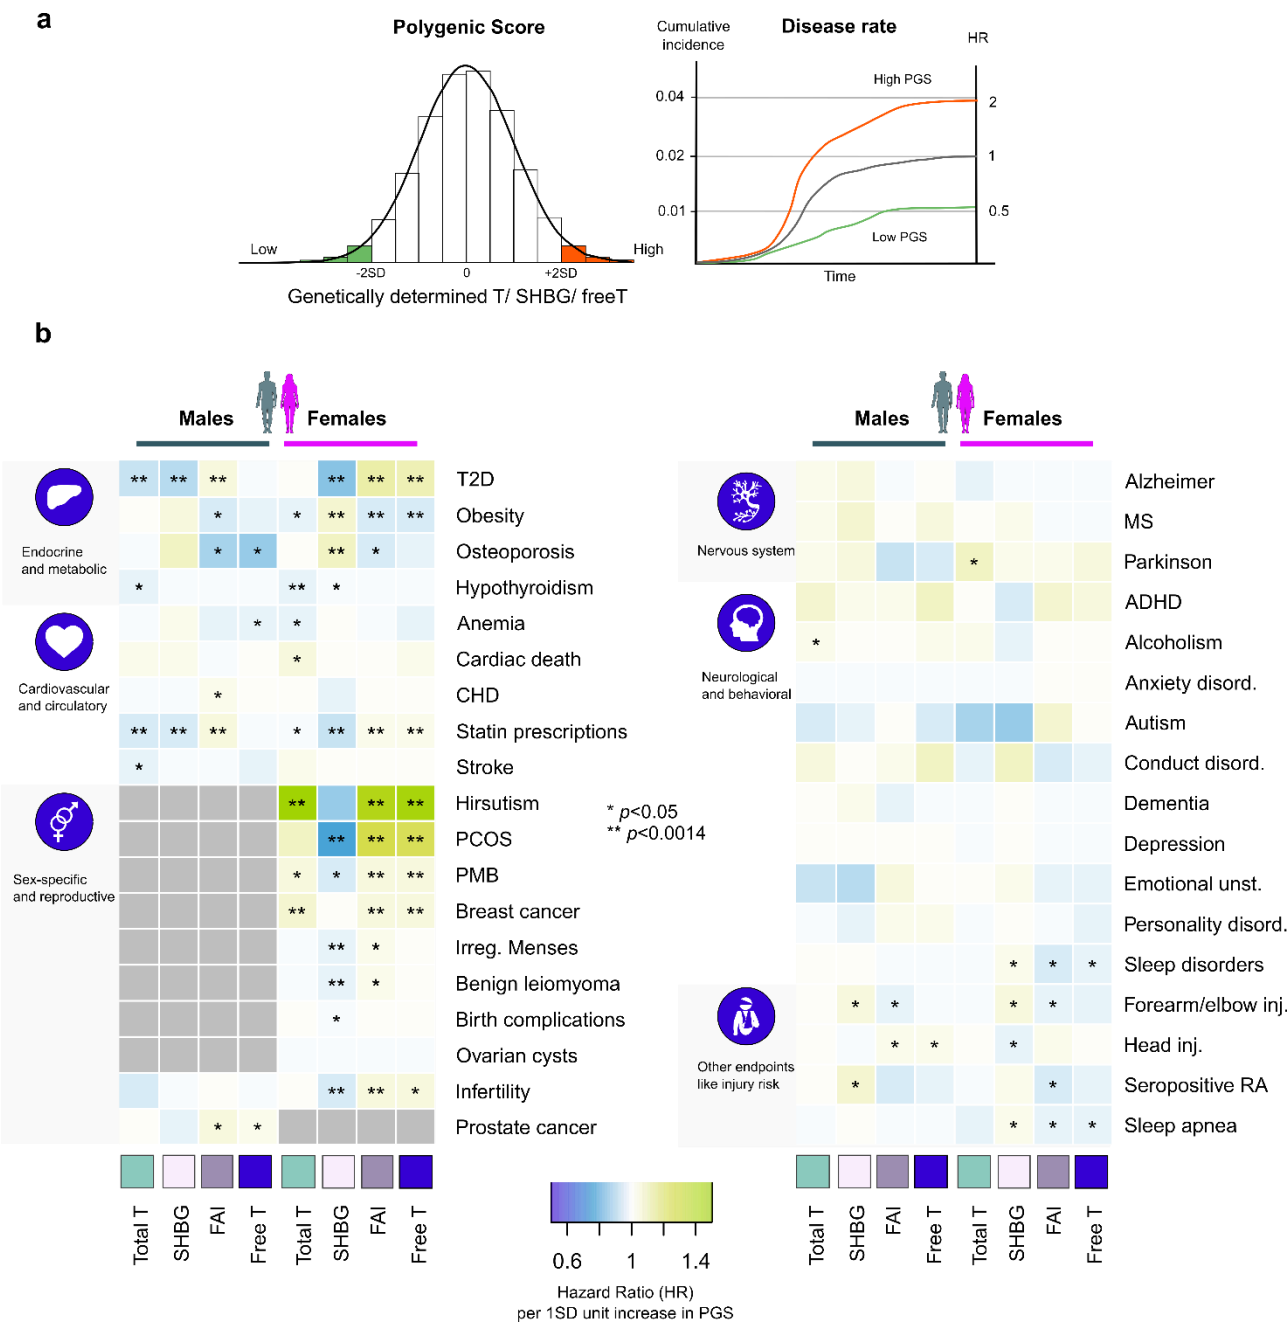

**a** Rationale of the PGS analyses. Calculation of the PGS in the FinnGen allows for ranking participants according to their genetic predisposition to higher T/ SHBG and free T levels. Then, the consequences of having either high/low genetically determined T can be estimated using the clinical information available from the FinnGen dataset. The figure on the right shows an example case where having a high PGS (2SD above population mean, orange) doubles the hazard ratio (HR) of getting diagnosed with a disease compared to those with an average PGS (grey line). The line green indicates those with low PGS (2SD below population mean) have only half of the risk of getting the diagnosis. **b** The heatmap illustrates hazard

ratios (HR) per 1SD increase in PGS for all studied traits in the sex-specific analyses.  $p < 0.0014$  corresponds to Bonferroni correction for 36 traits. Dark green symbol = males, pink = females. Green circles = total testosterone, white lilac = SHBG, grey = free androgen index, blue = free testosterone. Yellow shades = increased risk for endpoint, blue shades = decreased risk for endpoint. Grey box = endpoint not available for this sex. The data is based on 94,478 men and 122,986 women from FinnGen R5.

**Supplementary Figure 7. Schematic illustration of the power analysis for FinnGen disease associations**

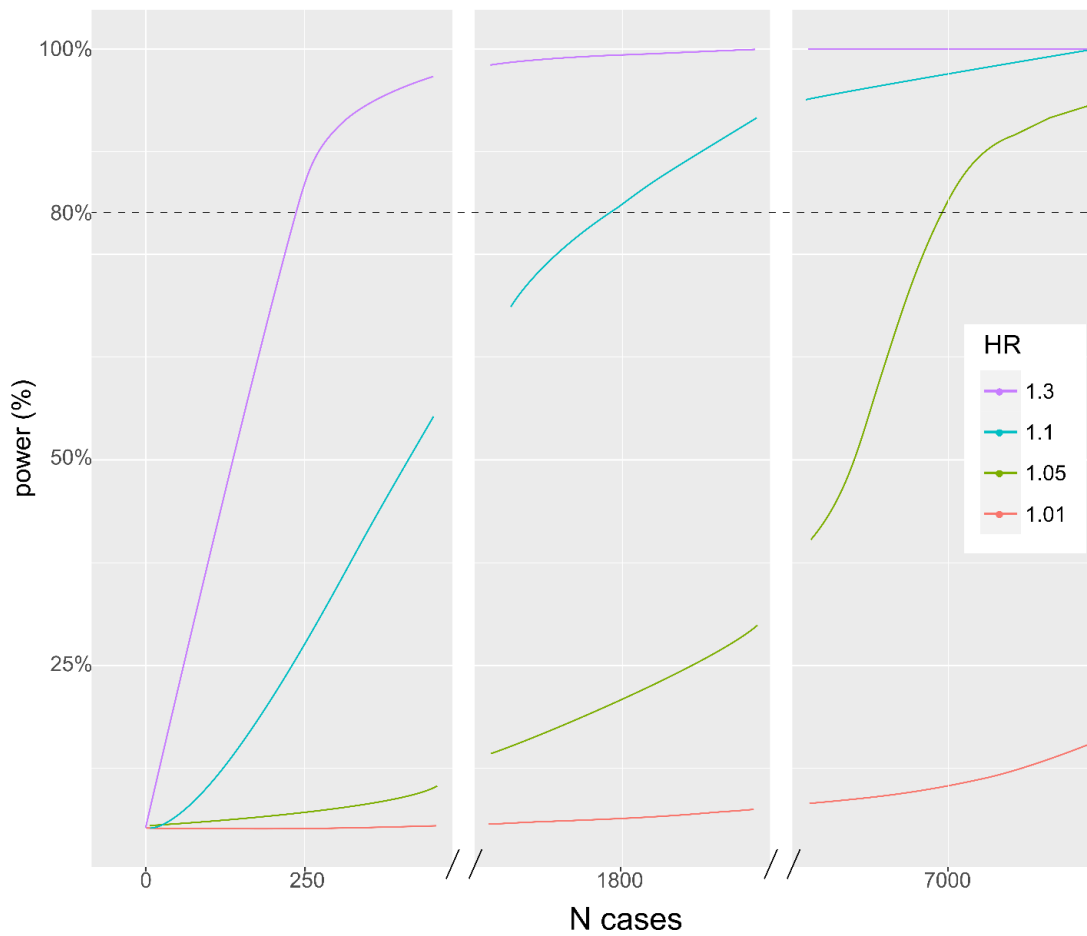

We estimate that even for the rarest phenotypes studied, given the selected  $p$ -value threshold (0.0014), we had full power to detect any large effects ( $HR > 1.3$ ) for the PGSs, and that we could reliably detect also subtler effects for most phenotypes. To exemplify this in practical terms, for rare diagnoses such as hirsutism and conduct disorder we had adequate power ( $> 80\%$ ) to detect large effects ( $HR > 1.3$ , purple line). We could detect at least intermediate effects ( $HR > 1.1$ , blue line) for the vast majority of the disease endpoints (over 1800 cases, 49/64 of the studied sex-specific endpoints (64 = the count of the studied disease endpoints when a sex-shared endpoint is considered as two independent endpoints, e.g. both male and female statin use are added to total sum). For the most common phenotypes like T2D and depression (more than 7000 cases, representing roughly a third of all included endpoints (20/64), we had the power to catch even smaller effects ( $HR > 1.05$ , green line). We did not have the power to detect very small effects per 1SD change in PGS ( $HR < 1.01$ , red line), yet such effects would be likely considered negligible in terms of medical relevance. The HR refers to risk per 1SD increase in the PGS for the studied T trait (total T, SHBG, FAI or free T) based on the PGS analysis in FinnGen. The curves are based on the selected  $p$ -value threshold of 0.0014, corresponding for multiple testing correction for 36 traits, and on power



calculation for Cox proportional Hazards Regression with powerSurvEpi package in R. Phenotypes and their N are listed in Supplementary Data 7 for both sexes separately. Please note that the X-axis marking case number is not continuous.

**Supplementary Figure 8. Comparison of unadjusted and SHBG-adjusted T PGS associations in FinnGen.**

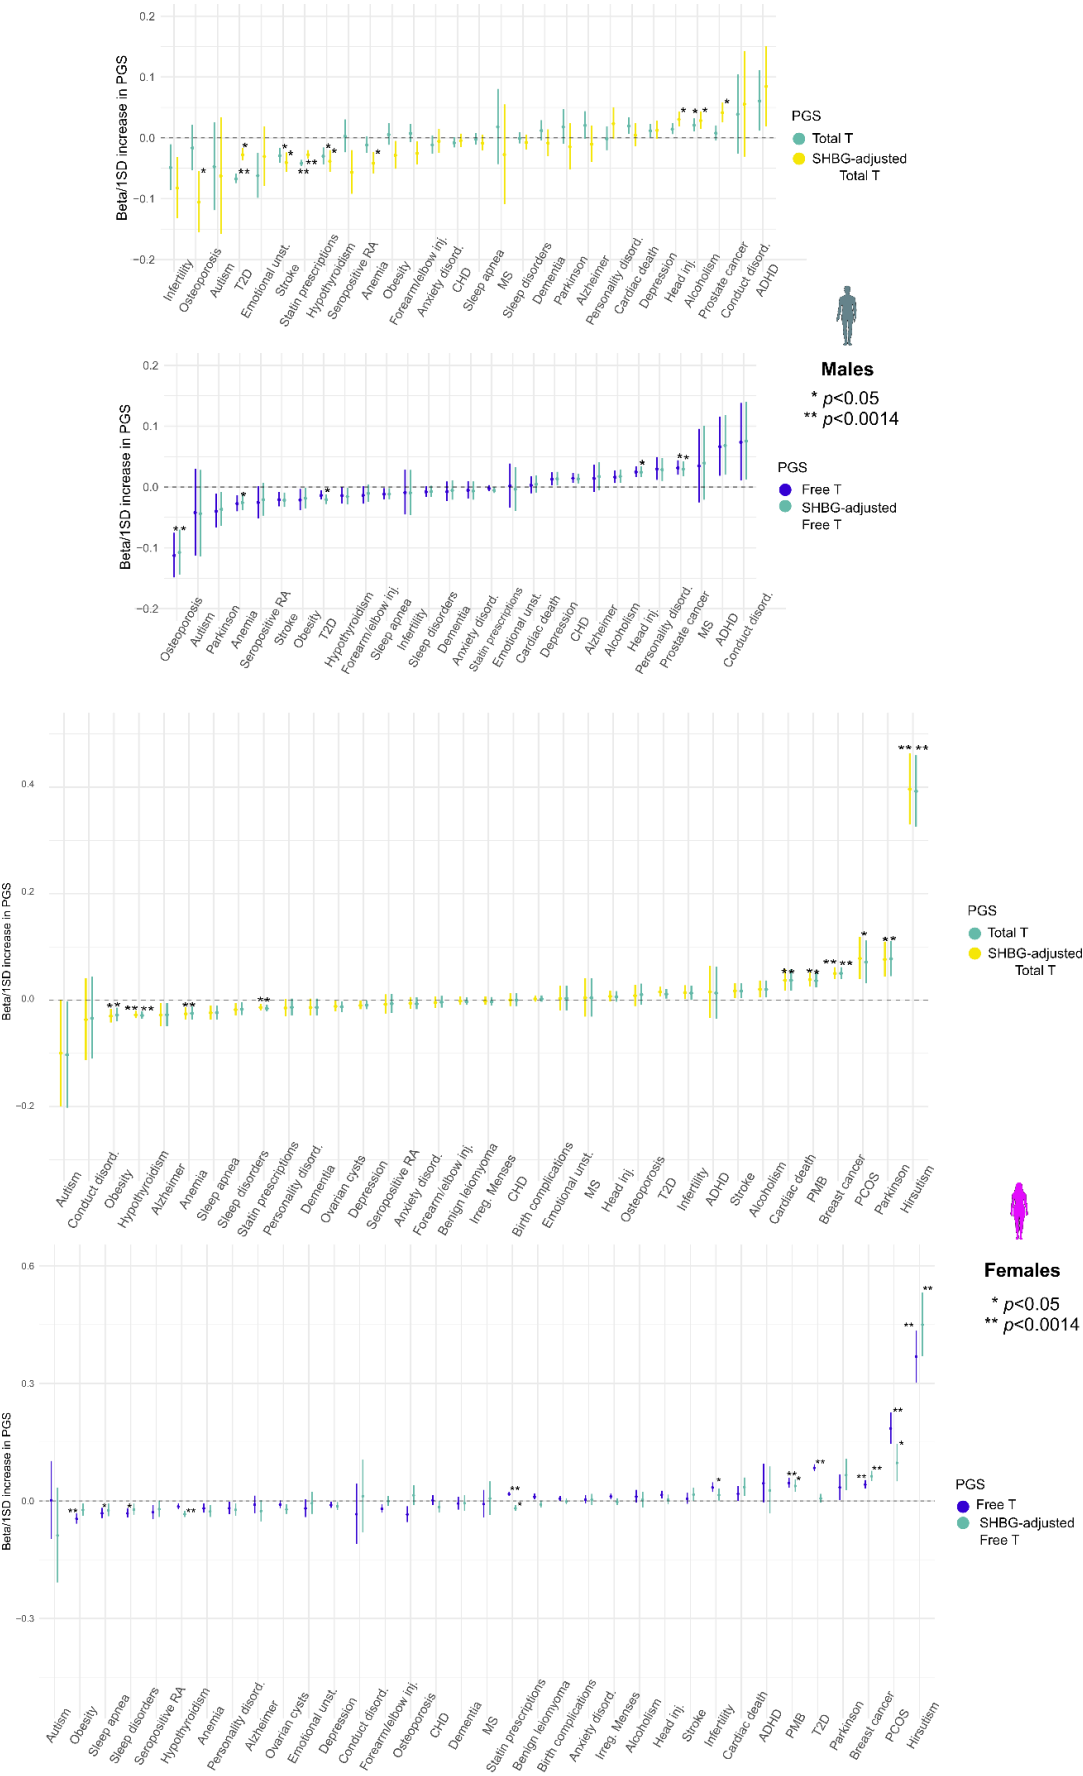

The figure shows disease risk per 1SD increase in PGS in a forest plot (beta and SE). Green = total T, yellow = SHBG-adjusted total T, blue = free T, light green = SHBG adjusted free T. The data is based on PGS association analyses comprising of 94,478 men and 122,986 women from FinnGen R5. For some endpoints, the effects between the unadjusted and the adjusted analysis appear different (e.g. only SHBG-adjusted total T showing nominally significant association to osteoporosis and prostate cancer in males). This suggests that the association of the unadjusted total T PGS to these endpoints suffers from the limitation that the PGS also reflects raised SHBG levels, which for these endpoints counteracts the effects of raised total T. This leads to at least two potential interpretations: first, this can be a sign of genetic pleiotropy, e.g. some genetic variants contributing to total T PGS affect both T and SHBG independently, or via another molecular pathway. Secondly, such a result may be a sign that a genetically set raise in SHBG leads to a biological compensation and raise in T levels (or vice versa), increased T binding by SHBG then counteracting the raise in T levels, and masking any associations that might result from direct (biologically available) T action.

Suggesting that both total T and SHBG in females likely contribute independently to PCOS, total T shows consistent association to PCOS both with and without SHBG adjustment, but free T association to PCOS is attenuated after SHBG adjustment. Notably, the statistically significant T associations to T2D disappear in both sexes (total T in men, free T in women) when taking into account the effect of SHBG in the analysis. For most other traits, the effects estimates remain highly similar between the unadjusted and adjusted analyses.

**Supplementary Figure 9. Visualisation of genetic correlations and causality analyses between T, SHBG, FAI and free T and the studied disease endpoints in FinnGen**

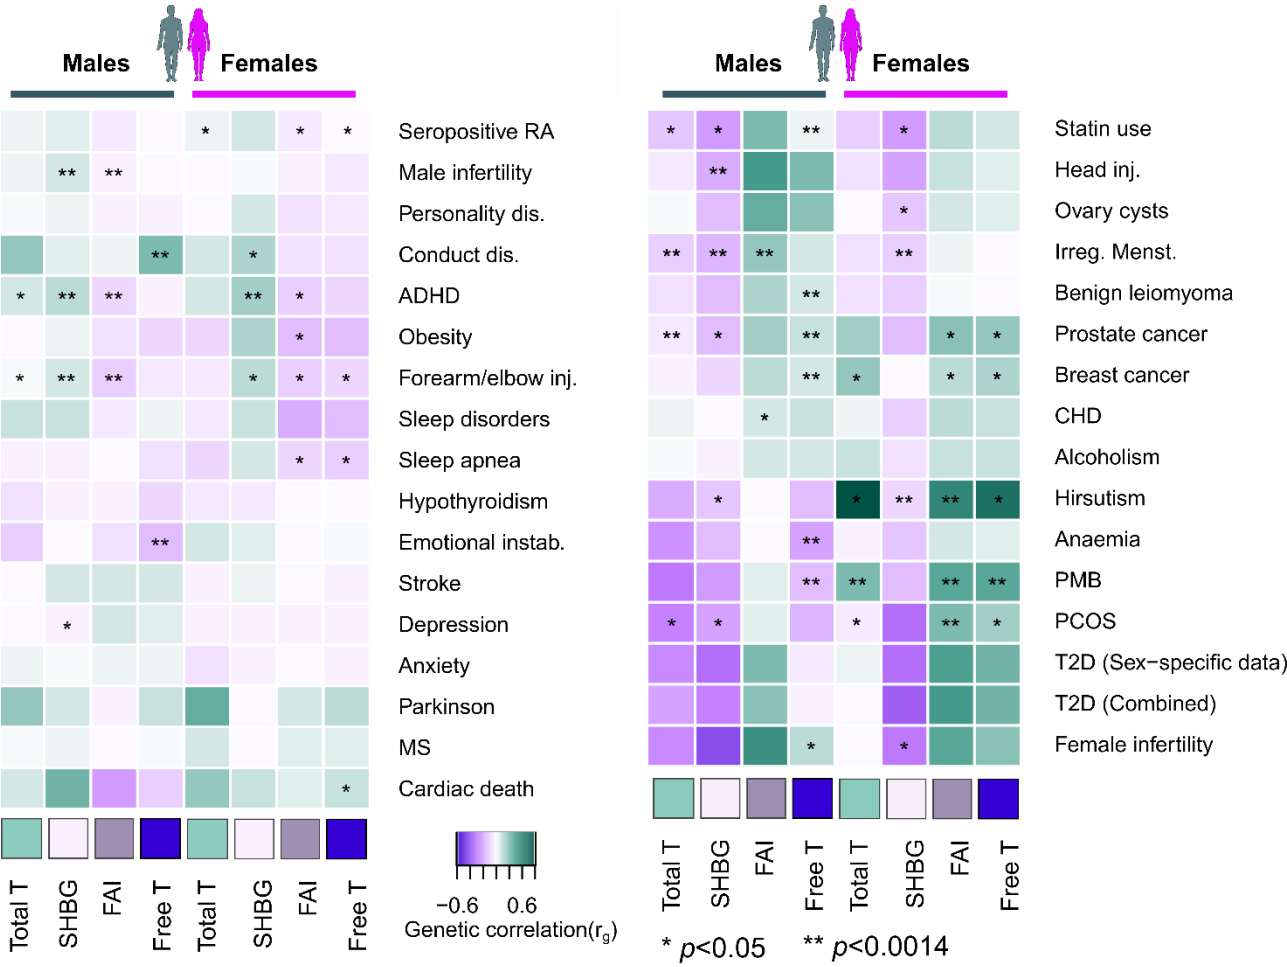

Heatmap colors indicate the direction and the strength of the genetic correlation (purple, negative correlation, green, positive correlation) based on LCV. Green = total testosterone, white lilac = SHBG, grey = free androgen index, blue = free testosterone. Positive genetic correlation means that same genetic variants that increase testosterone/SHBG increase also the risk for endpoint X. Asterisks indicate statistical support ( $p < 0.05$  and  $p < 0.0014$ ) for causality in either LCV or MR Egger analyses (Supplementary Data 8). Correlation without causation suggests that the genetic connection between the traits is likely mediated by genetic pleiotropy or that the causal effect is simply too weak to be detected. For both grids, the effects of male PGS on the studied trait is shown on left hand side (under green line), and the effect of the female PGS on the right (under pink line). Please note that this figure also illustrates the effects of male PGS for female traits, and vice versa. The data is based on PGS association analyses comprising of 94,478 men and 122,986 women from FinnGen R5.

**Supplementary Figure 10. The effects of body mass index (BMI) and other covariates on testosterone (T) levels and GWAS results in the UK Biobank**

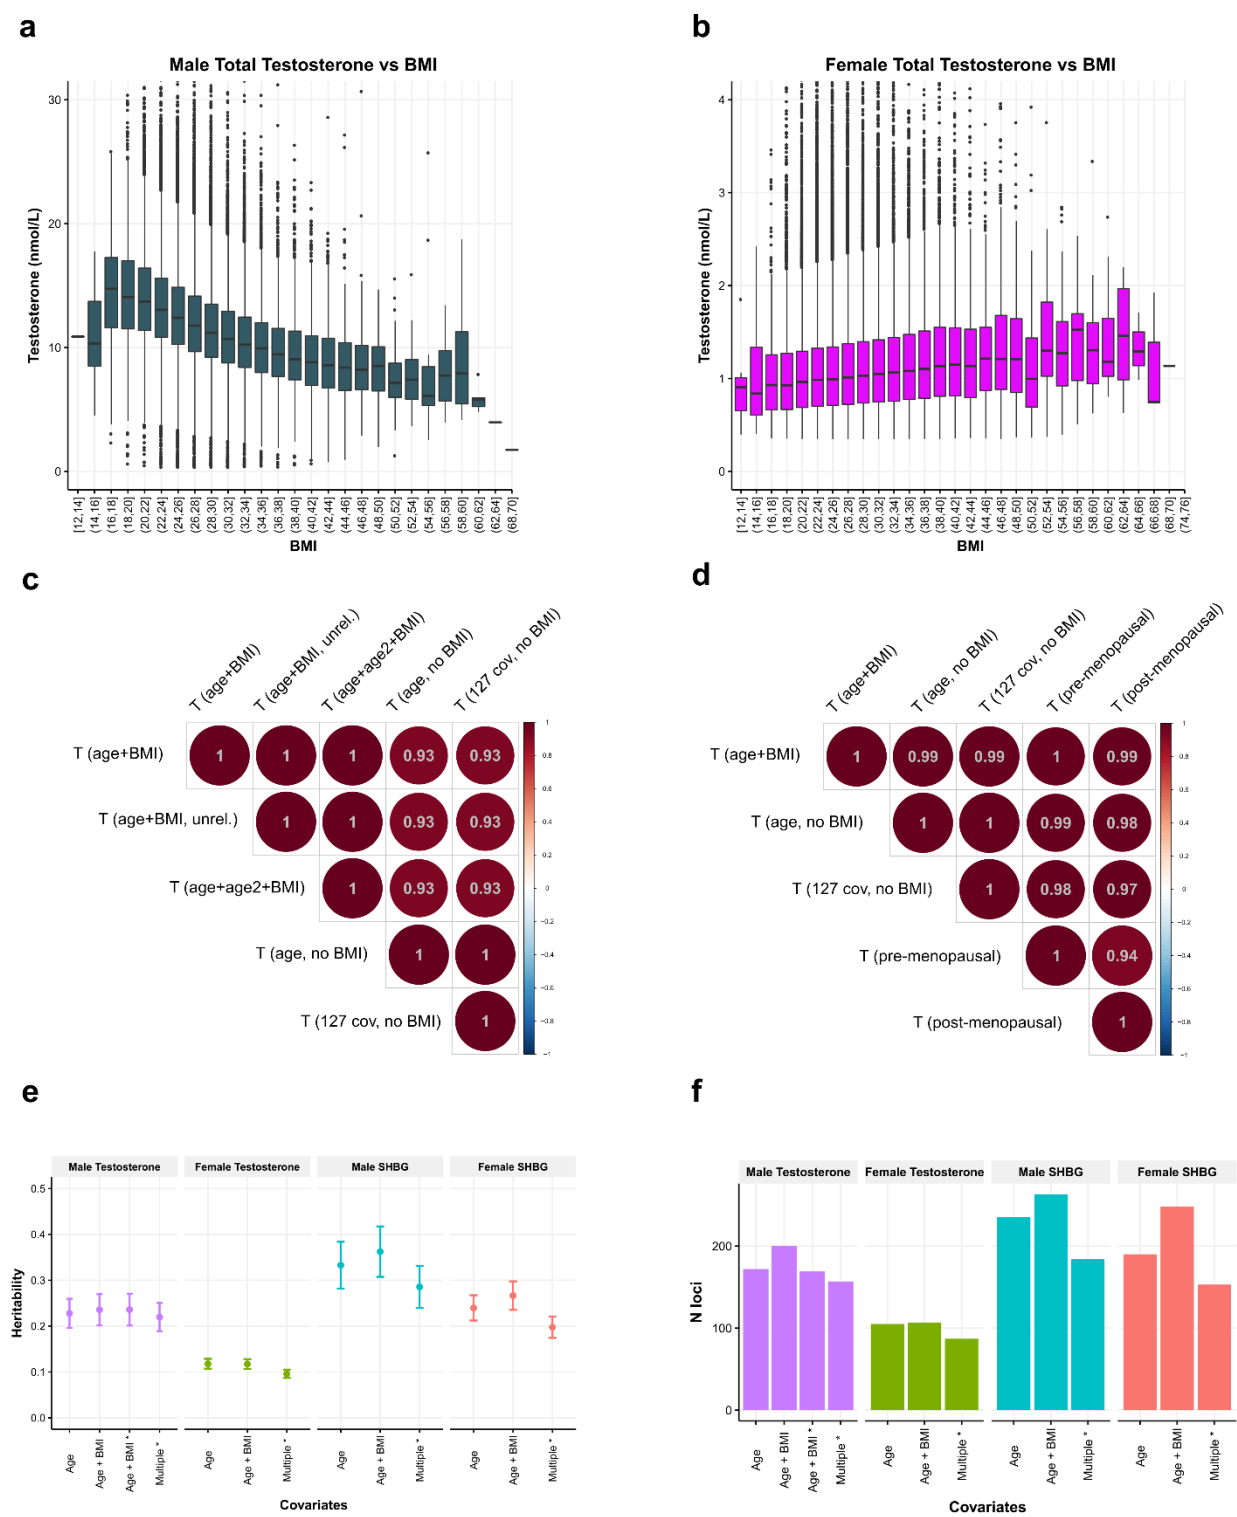

Panels **a** and **b** show the relationship between serum total T levels and BMI (binned in two unit intervals) in the UK Biobank for males (**a**, green boxplots) and females (**b**, pink boxplots), based on 177,186 men and 175,435 women participants with

white British ancestry and testosterone measurements available. For men, a significant negative correlation exists between BMI and T levels ( $R=-0.295$ ,  $p=0$ ), whereas this relationship is reversed in women ( $R=0.081$ ,  $p=2.9e-230$ ). The box plots show median (black line) and lower and upper quartiles (colored area of the box) for serum total T, and the error bars indicate 5% and 95% quantiles. For visual purposes, the Y-axis is capped at 30nmol/l in men and 4nmol/l in women. Panels **c** and **d** show genetic correlation from LDSC between total T GWAS runs under varying covariate combinations in men (**c**,  $N=176,212$ ) and women (**d**,  $N=174,850$ ), implying BMI has the largest effects on results, and that for example menopause status has only negligible effects on the genetic findings.  $N$  pre-menopausal women included in study = 48,876;  $N$  post-menopausal = 136,236. Dark red indicates high genetic correlation. Adding BMI as a covariate increased both the estimated heritability (LDSC) and the number of loci found for both total T and SHBG. Panel **e** shows heritability estimates with SE, and **f** shows the number of significant GWAS hits under different models in a bar plot. Lilac = total testosterone in men, green = total testosterone in women, turquoise = SHBG in men, red = SHBG in women. In panels **e** and **f** \* denotes a model with no relatives included in the analysis, and "multiple" refers to including 127 covariates from Sinnott-Armstrong et al. 2019. The results suggest that by using BMI as a covariate we can better capture any genetic variants affecting the studied traits in both sexes, and that the additional 127 covariates (for example, sample dilution factors) have negligible effects on the GWAS results.

Supplementary Information

FinnGen consortium members

| Full Name              | Affiliation                                                                                                                                                                             | Role1              | Role 2                            |
|------------------------|-----------------------------------------------------------------------------------------------------------------------------------------------------------------------------------------|--------------------|-----------------------------------|
| Aarno Palotie          | Institute for Molecular Medicine Finland (FIMM), HiLIFE, University of Helsinki, Helsinki; Broad Institute of MIT and Harvard; Massachusetts General Hospital, Boston MA, United States | Steering Committee | Steering Committee                |
| Mark Daly              | Institute for Molecular Medicine Finland (FIMM), HiLIFE, University of Helsinki, Helsinki; Broad Institute of MIT and Harvard; Massachusetts General Hospital, Boston MA, United States | Steering Committee | Steering Committee                |
| Bridget Riley-Gills    | Abbvie, Chicago, IL, United States                                                                                                                                                      | Steering Committee | Pharmaceutical companies          |
| Howard Jacob           | Abbvie, Chicago, IL, United States                                                                                                                                                      | Steering Committee | Pharmaceutical companies          |
| Dirk Paul              | Astra Zeneca, Cambridge, United Kingdom                                                                                                                                                 | Steering Committee | Pharmaceutical companies          |
| Athena Matakidou       | Astra Zeneca, Cambridge, United Kingdom                                                                                                                                                 | Steering Committee | Pharmaceutical companies          |
| Adam Platt             | Astra Zeneca, Cambridge, United Kingdom                                                                                                                                                 | Steering Committee | Pharmaceutical companies          |
| Heiko Runz             | Biogen, Cambridge, MA, United States                                                                                                                                                    | Steering Committee | Pharmaceutical companies          |
| Sally John Biogen,     | Cambridge, MA, United States                                                                                                                                                            | Steering Committee | Pharmaceutical companies          |
| George Okafo           | Boehringer Ingelheim, Ingelheim am Rhein, Germany                                                                                                                                       | Steering Committee | Pharmaceutical companies          |
| Nathan Lawless         | Boehringer Ingelheim, Ingelheim am Rhein, Germany                                                                                                                                       | Steering Committee | Pharmaceutical companies          |
| Heli Salminen-Mankonen | Boehringer Ingelheim, Ingelheim am Rhein, German                                                                                                                                        | Steering Committee | Pharmaceutical companies          |
| Robert Plenge          | Bristol Myers Squibb, New York, NY, United States                                                                                                                                       | Steering Committee | Pharmaceutical companies          |
| Joseph Maranville      | Bristol Myers Squibb, New York, NY, United States                                                                                                                                       | Steering Committee | Pharmaceutical companies          |
| Mark McCarthy          | Genentech, San Francisco, CA, United States                                                                                                                                             | Steering Committee | Pharmaceutical companies          |
| Margaret G. Ehm        | GlaxoSmithKline, Collegeville, PA, United States                                                                                                                                        | Steering Committee | Pharmaceutical companies          |
| Kirsi Auro             | GlaxoSmithKline, Espoo, Finland                                                                                                                                                         | Steering Committee | Pharmaceutical companies          |
| Simonne Longerich      | Merck, Kenilworth, NJ, United States                                                                                                                                                    | Steering Committee | Pharmaceutical companies          |
| Caroline Fox           | Merck, Kenilworth, NJ, United States                                                                                                                                                    | Steering Committee | Pharmaceutical companies          |
| Anders Mälarstig       | Pfizer, New York, NY, United States                                                                                                                                                     | Steering Committee | Pharmaceutical companies          |
| Katherine Klinger      | Translational Sciences, Sanofi R&D, Framingham, MA, USA                                                                                                                                 | Steering Committee | Pharmaceutical companies          |
| Clement Chatelain      | Translational Sciences, Sanofi R&D, Framingham, MA, USA                                                                                                                                 | Steering Committee | Pharmaceutical companies          |
| Matthias Gossel        | Translational Sciences, Sanofi R&D, Framingham, MA, USA                                                                                                                                 | Steering Committee | Pharmaceutical companies          |
| Karol Estrada          | Maze Therapeutics, San Francisco, CA, United States                                                                                                                                     | Steering Committee | Pharmaceutical companies          |
| Robert Graham          | Maze Therapeutics, San Francisco, CA, United States                                                                                                                                     | Steering Committee | Pharmaceutical companies          |
| Robert Yang            | Janssen Biotech, Beerse, Belgium                                                                                                                                                        | Steering Committee | Pharmaceutical companies          |
| Chris O'Donnell        | Novartis Institutes for BioMedical Research, Cambridge, MA, United States                                                                                                               | Steering Committee | Pharmaceutical companies          |
| Tomi P. Mäkelä         | HiLIFE, University of Helsinki, Finland, Finland                                                                                                                                        | Steering Committee | University of Helsinki & Biobanks |
| Jaakko Kaprio          | Institute for Molecular Medicine Finland (FIMM), HiLIFE, University of Helsinki, Helsinki, Finland                                                                                      | Steering Committee | University of Helsinki & Biobanks |
| Petri Virolainen       | FinlandAuria Biobank / University of Turku / Hospital District of Southwest Finland, Turku,                                                                                             | Steering Committee | University of Helsinki & Biobanks |
| Antti Hakanen          | FinlandAuria Biobank / University of Turku / Hospital District of Southwest Finland, Turku,                                                                                             | Steering Committee | University of Helsinki & Biobanks |
| Terhi Kilpi            | FinlandTHL Biobank / Finnish Institute for Health and Welfare (THL), Helsinki, Finland                                                                                                  | Steering Committee | University of Helsinki & Biobanks |
| Markus Perola          | THL Biobank / Finnish Institute for Health and Welfare (THL), Helsinki, Finland                                                                                                         | Steering Committee | University of Helsinki & Biobanks |
| Jukka Partanen         | Finnish Red Cross Blood Service / Finnish Hematology Registry and Clinical Biobank, Helsinki, Finland                                                                                   | Steering Committee | University of Helsinki & Biobanks |
| Anne Pitkäranta        | Helsinki Biobank / Helsinki University and Hospital District of Helsinki and Uusimaa, Helsinki, Finland                                                                                 | Steering Committee | University of Helsinki & Biobanks |
| Taneli Raivio          | Helsinki Biobank / Helsinki University and Hospital District of Helsinki and Uusimaa, Helsinki, Finland                                                                                 | Steering Committee | University of Helsinki & Biobanks |
| Raisa Serpi            | Northern Finland Biobank Borealis / University of Oulu / Northern Ostrobothnia Hospital District, Oulu, Finland                                                                         | Steering Committee | University of Helsinki & Biobanks |
| Tarja Laitinen         | Finnish Clinical Biobank Tampere / University of Tampere / Pirkanmaa Hospital District, Tampere, Finland                                                                                | Steering Committee | University of Helsinki & Biobanks |
| Veli-Matti Kosma       | Biobank of Eastern Finland / University of Eastern Finland / Northern Savo Hospital District, Kuopio, Finland                                                                           | Steering Committee | University of Helsinki & Biobanks |
| Jari Laukkanen         | Central Finland Biobank / University of Jyväskylä / Central Finland Health Care District, Jyväskylä, Finland                                                                            | Steering Committee | University of Helsinki & Biobanks |
| Marco Hautalahti       | FINBB - Finnish biobank cooperative                                                                                                                                                     | Steering Committee | University of Helsinki & Biobanks |

|                         |                                                                                                                 |                      |                                   |
|-------------------------|-----------------------------------------------------------------------------------------------------------------|----------------------|-----------------------------------|
| Outi Tuovila            | Business Finland, Helsinki, Finland                                                                             | Steering Committee   | Other Experts/ Non-Voting Members |
| Raimo Pakkanen          | Business Finland, Helsinki, Finland                                                                             | Steering Committee   | Other Experts/ Non-Voting Members |
| Jeffrey Waring          | Abbvie, Chicago, IL, United States                                                                              | Scientific Committee | Pharmaceutical companies          |
| Bridget Riley-Gillis    | Abbvie, Chicago, IL, United States                                                                              | Scientific Committee | Pharmaceutical companies          |
| Fedik Rahimov           | Abbvie, Chicago, IL, United States                                                                              | Scientific Committee | Pharmaceutical companies          |
| Ioanna Tachmazidou      | Astra Zeneca, Cambridge, United Kingdom                                                                         | Scientific Committee | Pharmaceutical companies          |
| Chia-Yen Chen           | Biogen, Cambridge, MA, United States                                                                            | Scientific Committee | Pharmaceutical companies          |
| Heiko Runz              | Biogen, Cambridge, MA, United States                                                                            | Scientific Committee | Pharmaceutical companies          |
| Zhihao Ding             | Boehringer Ingelheim, Ingelheim am Rhein, Germany                                                               | Scientific Committee | Pharmaceutical companies          |
| Marc Jung               | Boehringer Ingelheim, Ingelheim am Rhein, Germany                                                               | Scientific Committee | Pharmaceutical companies          |
| Shameek Biswas          | Bristol Myers Squibb, New York, NY, United States                                                               | Scientific Committee | Pharmaceutical companies          |
| Rion Pendergrass        | Genentech, San Francisco, CA, United States                                                                     | Scientific Committee | Pharmaceutical companies          |
| Margaret G. Ehm         | GlaxoSmithKline, Collegeville, PA, United States                                                                | Scientific Committee | Pharmaceutical companies          |
| David Pulford           | GlaxoSmithKline, Stevenage, United Kingdom                                                                      | Scientific Committee | Pharmaceutical companies          |
| Neha Raghavan           | Merck, Kenilworth, NJ, United States                                                                            | Scientific Committee | Pharmaceutical companies          |
| Adriana Huertas-Vazquez | Merck, Kenilworth, NJ, United States                                                                            | Scientific Committee | Pharmaceutical companies          |
| Jae-Hoon Sul            | Merck, Kenilworth, NJ, United States                                                                            | Scientific Committee | Pharmaceutical companies          |
| Anders Mälarstig        | Pfizer, New York, NY, United States                                                                             | Scientific Committee | Pharmaceutical companies          |
| Xinli Hu                | Pfizer, New York, NY, United States                                                                             | Scientific Committee | Pharmaceutical companies          |
| Åsa Hedman              | Pfizer, New York, NY, United States                                                                             | Scientific Committee | Pharmaceutical companies          |
| Katherine Klinger       | Translational Sciences, Sanofi R&D, Framingham, MA, USA                                                         | Scientific Committee | Pharmaceutical companies          |
| Robert Graham           | Maze Therapeutics, San Francisco, CA, United States                                                             | Scientific Committee | Pharmaceutical companies          |
| Manuel Rivas            | Maze Therapeutics, San Francisco, CA, United States                                                             | Scientific Committee | Pharmaceutical companies          |
| Dawn Waterworth         | Janssen Research & Development, LLC, Spring House, PA, United States                                            | Scientific Committee | Pharmaceutical companies          |
| Nicole Renaud           | Novartis Institutes for BioMedical Research, Cambridge, MA, United States                                       | Scientific Committee | Pharmaceutical companies          |
| Ma'en Obeidat           | Novartis Institutes for BioMedical Research, Cambridge, MA, United States                                       | Scientific Committee | Pharmaceutical companies          |
| Johanna Schleutker      | Auria Biobank / Univ. of Turku / Hospital District of Southwest Finland, Turku, Finland                         | Scientific Committee | University of Helsinki & Biobanks |
| Markus Perola           | THL Biobank / Finnish Institute for Health and Welfare (THL), Helsinki, Finland                                 | Scientific Committee | University of Helsinki & Biobanks |
| Samuli Ripatti          | Institute for Molecular Medicine Finland (FIMM), HiLIFE, University of Helsinki, Helsinki, Finland              | Scientific Committee | University of Helsinki & Biobanks |
| Mikko Arvas             | Finnish Red Cross Blood Service / Finnish Hematology Registry and Clinical Biobank, Helsinki, Finland           | Scientific Committee | University of Helsinki & Biobanks |
| Olli Carpén             | Helsinki Biobank / Helsinki University and Hospital District of Helsinki and Uusimaa, Helsinki, Finland         | Scientific Committee | University of Helsinki & Biobanks |
| Reetta Hinttala         | Northern Finland Biobank Borealis / University of Oulu / Northern Ostrobothnia Hospital District, Oulu, Finland | Scientific Committee | University of Helsinki & Biobanks |
| Johannes Kettunen       | Northern Finland Biobank Borealis / University of Oulu / Northern Ostrobothnia Hospital District, Oulu, Finland | Scientific Committee | University of Helsinki & Biobanks |
| Arto Mannermaa          | Biobank of Eastern Finland / University of Eastern Finland / Northern Savo Hospital District, Kuopio, Finland   | Scientific Committee | University of Helsinki & Biobanks |
| Katriina Aalto-Setälä   | Faculty of Medicine and Health Technology, Tampere University, Tampere, Finland                                 | Scientific Committee | University of Helsinki & Biobanks |
| Mika Kähönen            | Finnish Clinical Biobank Tampere / University of Tampere / Pirkanmaa Hospital District, Tampere, Finland        | Scientific Committee | University of Helsinki & Biobanks |
| Jari Laukkanen          | Central Finland Biobank / University of Jyväskylä / Central Finland Health Care District, Jyväskylä, Finland    | Scientific Committee | University of Helsinki & Biobanks |
| Johanna Mäkelä          | FINBB - Finnish biobank cooperative                                                                             | Scientific Committee | University of Helsinki & Biobanks |
| Reetta Kälviäinen       | Northern Savo Hospital District, Kuopio, Finland                                                                | Clinical Groups      | Neurology Group                   |
| Valtteri Julkunen       | Northern Savo Hospital District, Kuopio, Finland                                                                | Clinical Groups      | Neurology Group                   |
| Hiikka Soininen         | Northern Savo Hospital District, Kuopio, Finland                                                                | Clinical Groups      | Neurology Group                   |
| Anne Remes              | Northern Ostrobothnia Hospital District, Oulu, Finland                                                          | Clinical Groups      | Neurology Group                   |
| Mikko Hiltunen          | University of Eastern Finland, Kuopio, Finland                                                                  | Clinical Groups      | Neurology Group                   |
| Jukka Peltola           | Pirkanmaa Hospital District, Tampere, Finland                                                                   | Clinical Groups      | Neurology Group                   |



|                      |                                                                                                                                                                                         |                 |                        |
|----------------------|-----------------------------------------------------------------------------------------------------------------------------------------------------------------------------------------|-----------------|------------------------|
| Minna Raivio         | Hospital District of Helsinki and Uusimaa, Helsinki, Finland                                                                                                                            | Clinical Groups | Neurology Group        |
| Pentti Tienari       | Hospital District of Helsinki and Uusimaa, Helsinki, Finland                                                                                                                            | Clinical Groups | Neurology Group        |
| Juha Rinne           | Hospital District of Southwest Finland, Turku, Finland                                                                                                                                  | Clinical Groups | Neurology Group        |
| Roosa Kallionpää     | Hospital District of Southwest Finland, Turku, Finland                                                                                                                                  | Clinical Groups | Neurology Group        |
| Juulia Partanen      | Institute for Molecular Medicine Finland, HiLIFE, University of Helsinki, Finland                                                                                                       | Clinical Groups | Neurology Group        |
| Ali Abbasi           | Abbvie, Chicago, IL, United States                                                                                                                                                      | Clinical Groups | Neurology Group        |
| Adam Ziemann         | Abbvie, Chicago, IL, United States                                                                                                                                                      | Clinical Groups | Neurology Group        |
| Nizar Smaoui         | Abbvie, Chicago, IL, United States                                                                                                                                                      | Clinical Groups | Neurology Group        |
| Anne Lehtonen        | Abbvie, Chicago, IL, United States                                                                                                                                                      | Clinical Groups | Neurology Group        |
| Susan Eaton          | Biogen, Cambridge, MA, United States                                                                                                                                                    | Clinical Groups | Neurology Group        |
| Heiko Runz           | Biogen, Cambridge, MA, United States                                                                                                                                                    | Clinical Groups | Neurology Group        |
| Sanni Lahdenperä     | Biogen, Cambridge, MA, United States                                                                                                                                                    | Clinical Groups | Neurology Group        |
| Shameek Biswas       | Bristol Myers Squibb, New York, NY, United States                                                                                                                                       | Clinical Groups | Neurology Group        |
| Natalie Bowers       | Genentech, San Francisco, CA, United States                                                                                                                                             | Clinical Groups | Neurology Group        |
| Edmond Teng          | Genentech, San Francisco, CA, United States                                                                                                                                             | Clinical Groups | Neurology Group        |
| Rion Pendergrass     | Genentech, San Francisco, CA, United States                                                                                                                                             | Clinical Groups | Neurology Group        |
| Fanli Xu             | GlaxoSmithKline, Brentford, United Kingdom                                                                                                                                              | Clinical Groups | Neurology Group        |
| David Pulford        | GlaxoSmithKline, Stevenage, United Kingdom                                                                                                                                              | Clinical Groups | Neurology Group        |
| Kirsi Auro           | GlaxoSmithKline, Espoo, Finland                                                                                                                                                         | Clinical Groups | Neurology Group        |
| Laura Addis          | GlaxoSmithKline, Brentford, United Kingdom                                                                                                                                              | Clinical Groups | Neurology Group        |
| John Eicher          | GlaxoSmithKline, Brentford, United Kingdom                                                                                                                                              | Clinical Groups | Neurology Group        |
| Qingqin S Li         | Janssen Research & Development, LLC, Titusville, NJ 08560, United States                                                                                                                | Clinical Groups | Neurology Group        |
| Karen He             | Janssen Research & Development, LLC, Spring House, PA, United States                                                                                                                    | Clinical Groups | Neurology Group        |
| Ekaterina Khramtsova | Janssen Research & Development, LLC, Spring House, PA, United States                                                                                                                    | Clinical Groups | Neurology Group        |
| Neha Raghavan        | Merck, Kenilworth, NJ, United States                                                                                                                                                    | Clinical Groups | Neurology Group        |
| Martti Färkkilä      | Hospital District of Helsinki and Uusimaa, Helsinki, Finland                                                                                                                            | Clinical Groups | Gastroenterology Group |
| Jukka Koskela        | Hospital District of Helsinki and Uusimaa, Helsinki, Finland                                                                                                                            | Clinical Groups | Gastroenterology Group |
| Sampsa Pikkarainen   | Hospital District of Helsinki and Uusimaa, Helsinki, Finland                                                                                                                            | Clinical Groups | Gastroenterology Group |
| Airi Jussila         | Pirkanmaa Hospital District, Tampere, Finland                                                                                                                                           | Clinical Groups | Gastroenterology Group |
| Katri Kaukinen       | Pirkanmaa Hospital District, Tampere, Finland                                                                                                                                           | Clinical Groups | Gastroenterology Group |
| Timo Blomster        | Northern Ostrobothnia Hospital District, Oulu, Finland                                                                                                                                  | Clinical Groups | Gastroenterology Group |
| Mikko Kiviniemi      | Northern Savo Hospital District, Kuopio, Finland                                                                                                                                        | Clinical Groups | Gastroenterology Group |
| Markku Voutilainen   | Hospital District of Southwest Finland, Turku, Finland                                                                                                                                  | Clinical Groups | Gastroenterology Group |
| Mark Daly            | Institute for Molecular Medicine Finland (FIMM), HiLIFE, University of Helsinki, Helsinki; Broad Institute of MIT and Harvard; Massachusetts General Hospital, Boston MA, United States | Clinical Groups | Gastroenterology Group |
| Ali Abbasi           | Abbvie, Chicago, IL, United States                                                                                                                                                      | Clinical Groups | Gastroenterology Group |
| Jeffrey Waring       | Abbvie, Chicago, IL, United States                                                                                                                                                      | Clinical Groups | Gastroenterology Group |
| Nizar Smaoui         | Abbvie, Chicago, IL, United States                                                                                                                                                      | Clinical Groups | Gastroenterology Group |
| Fedik Rahimov        | Abbvie, Chicago, IL, United States                                                                                                                                                      | Clinical Groups | Gastroenterology Group |
| Anne Lehtonen        | Abbvie, Chicago, IL, United States                                                                                                                                                      | Clinical Groups | Gastroenterology Group |
| Tim Lu               | Genentech, San Francisco, CA, United States                                                                                                                                             | Clinical Groups | Gastroenterology Group |
| Natalie Bowers       | Genentech, San Francisco, CA, United States                                                                                                                                             | Clinical Groups | Gastroenterology Group |
| Rion Pendergrass     | Genentech, San Francisco, CA, United States                                                                                                                                             | Clinical Groups | Gastroenterology Group |
| Linda McCarthy       | GlaxoSmithKline, Brentford, United Kingdom                                                                                                                                              | Clinical Groups | Gastroenterology Group |
| Amy Hart             | Janssen Research & Development, LLC, Spring House, PA, United States                                                                                                                    | Clinical Groups | Gastroenterology Group |

|                         |                                                                                                                                    |                 |                        |
|-------------------------|------------------------------------------------------------------------------------------------------------------------------------|-----------------|------------------------|
| Meijian Guan            | Janssen Research & Development, LLC, Spring House, PA, United States                                                               | Clinical Groups | Gastroenterology Group |
| Jason Miller            | Merck, Kenilworth, NJ, United States                                                                                               | Clinical Groups | Gastroenterology Group |
| Kirsi Kalpala           | Pfizer, New York, NY, United States                                                                                                | Clinical Groups | Gastroenterology Group |
| Melissa Miller          | Pfizer, New York, NY, United States                                                                                                | Clinical Groups | Gastroenterology Group |
| Xinli Hu                | Pfizer, New York, NY, United States                                                                                                | Clinical Groups | Gastroenterology Group |
| Kari Eklund             | Hospital District of Helsinki and Uusimaa, Helsinki, Finland                                                                       | Clinical Groups | Rheumatology Group     |
| Antti Palomäki          | Hospital District of Southwest Finland, Turku, Finland                                                                             | Clinical Groups | Rheumatology Group     |
| Pia Isomäki             | Pirkanmaa Hospital District, Tampere, Finland                                                                                      | Clinical Groups | Rheumatology Group     |
| Laura Piriä             | Hospital District of Southwest Finland, Turku, Finland                                                                             | Clinical Groups | Rheumatology Group     |
| Olli Kaipainen-Seppänen | Northern Savo Hospital District, Kuopio, Finland                                                                                   | Clinical Groups | Rheumatology Group     |
| Johanna Huhtakangas     | Northern Ostrobothnia Hospital District, Oulu, Finland                                                                             | Clinical Groups | Rheumatology Group     |
| Nina Mars               | Institute for Molecular Medicine Finland (FIMM), HiLIFE, University of Helsinki, Helsinki, Finland                                 | Clinical Groups | Rheumatology Group     |
| Ali Abbasi              | Abbvie, Chicago, IL, United States                                                                                                 | Clinical Groups | Rheumatology Group     |
| Jeffrey Waring          | Abbvie, Chicago, IL, United States                                                                                                 | Clinical Groups | Rheumatology Group     |
| Fedik Rahimov           | Abbvie, Chicago, IL, United States                                                                                                 | Clinical Groups | Rheumatology Group     |
| Apinya Lertratanakul    | Abbvie, Chicago, IL, United States                                                                                                 | Clinical Groups | Rheumatology Group     |
| Nizar Smaoui            | Abbvie, Chicago, IL, United States                                                                                                 | Clinical Groups | Rheumatology Group     |
| Anne Lehtonen           | Abbvie, Chicago, IL, United States                                                                                                 | Clinical Groups | Rheumatology Group     |
| Marla Hochfeld          | Bristol Myers Squibb, New York, NY, United States                                                                                  | Clinical Groups | Rheumatology Group     |
| Natalie Bowers          | Genentech, San Francisco, CA, United States                                                                                        | Clinical Groups | Rheumatology Group     |
| Rion Pendergrass        | Genentech, San Francisco, CA, United States                                                                                        | Clinical Groups | Rheumatology Group     |
| Jorge Esparza Gordillo  | GlaxoSmithKline, Brentford, United Kingdom                                                                                         | Clinical Groups | Rheumatology Group     |
| Kirsi Auro              | GlaxoSmithKline, Espoo, Finland                                                                                                    | Clinical Groups | Rheumatology Group     |
| Dawn Waterworth         | Janssen Research & Development, LLC, Spring House, PA, United States                                                               | Clinical Groups | Rheumatology Group     |
| Fabiana Farias          | Merck, Kenilworth, NJ, United States                                                                                               | Clinical Groups | Rheumatology Group     |
| Kirsi Kalpala           | Pfizer, New York, NY, United States                                                                                                | Clinical Groups | Rheumatology Group     |
| Nan Bing                | Pfizer, New York, NY, United States                                                                                                | Clinical Groups | Rheumatology Group     |
| Xinli Hu                | Pfizer, New York, NY, United States                                                                                                | Clinical Groups | Rheumatology Group     |
| Tarja Laitinen          | Pirkanmaa Hospital District, Tampere, Finland                                                                                      | Clinical Groups | Pulmonology Group      |
| Margit Pelkonen         | Northern Savo Hospital District, Kuopio, Finland                                                                                   | Clinical Groups | Pulmonology Group      |
| Paula Kauppi            | Hospital District of Helsinki and Uusimaa, Helsinki, Finland                                                                       | Clinical Groups | Pulmonology Group      |
| Hannu Kankaanranta      | University of Gothenburg, Gothenburg, Sweden/ Seinäjoki Central Hospital, Seinäjoki, Finland/ Tampere University, Tampere, Finland | Clinical Groups | Pulmonology Group      |
| Terttu Harju            | Northern Ostrobothnia Hospital District, Oulu, Finland                                                                             | Clinical Groups | Pulmonology Group      |
| Riitta Lahesmaa         | Hospital District of Southwest Finland, Turku, Finland                                                                             | Clinical Groups | Pulmonology Group      |
| Nizar Smaoui            | Abbvie, Chicago, IL, United States                                                                                                 | Clinical Groups | Pulmonology Group      |
| Glenda Lassi            | Astra Zeneca, Cambridge, United Kingdom                                                                                            | Clinical Groups | Pulmonology Group      |
| Susan Eaton             | Biogen, Cambridge, MA, United States                                                                                               | Clinical Groups | Pulmonology Group      |
| Hubert Chen             | Genentech, San Francisco, CA, United States                                                                                        | Clinical Groups | Pulmonology Group      |
| Rion Pendergrass        | Genentech, San Francisco, CA, United States                                                                                        | Clinical Groups | Pulmonology Group      |
| Natalie Bowers          | Genentech, San Francisco, CA, United States                                                                                        | Clinical Groups | Pulmonology Group      |
| Joanna Betts            | GlaxoSmithKline, Brentford, United Kingdom                                                                                         | Clinical Groups | Pulmonology Group      |
| Kirsi Auro              | GlaxoSmithKline, Espoo, Finland                                                                                                    | Clinical Groups | Pulmonology Group      |
| Rajashree Mishra        | GlaxoSmithKline, Brentford, United Kingdom                                                                                         | Clinical Groups | Pulmonology Group      |
| Majd Mouded             | Novartis, Basel, Switzerland                                                                                                       | Clinical Groups | Pulmonology Group      |

|                       |                                                                                                                                                                                             |                 |                                |
|-----------------------|---------------------------------------------------------------------------------------------------------------------------------------------------------------------------------------------|-----------------|--------------------------------|
| Debby Ngo             | Novartis, Basel, Switzerland                                                                                                                                                                | Clinical Groups | Pulmonology Group              |
| Teemu Niiranen        | Finnish Institute for Health and Welfare (THL), Helsinki, Finland                                                                                                                           | Clinical Groups | Cardiometabolic Diseases Group |
| Felix Vaura           | Finnish Institute for Health and Welfare (THL), Helsinki, Finland                                                                                                                           | Clinical Groups | Cardiometabolic Diseases Group |
| Veikko Salomaa        | Finnish Institute for Health and Welfare (THL), Helsinki, Finland                                                                                                                           | Clinical Groups | Cardiometabolic Diseases Group |
| Kaj Metsärinne        | Hospital District of Southwest Finland, Turku, Finland                                                                                                                                      | Clinical Groups | Cardiometabolic Diseases Group |
| Jenni Aittokallio     | Hospital District of Southwest Finland, Turku, Finland                                                                                                                                      | Clinical Groups | Cardiometabolic Diseases Group |
| Jussi Hernesniemi     | Pirkanmaa Hospital District, Tampere, Finland                                                                                                                                               | Clinical Groups | Cardiometabolic Diseases Group |
| Daniel Gordin         | Hospital District of Helsinki and Uusimaa, Helsinki, Finland                                                                                                                                | Clinical Groups | Cardiometabolic Diseases Group |
| Juha Sinisalo         | Hospital District of Helsinki and Uusimaa, Helsinki, Finland                                                                                                                                | Clinical Groups | Cardiometabolic Diseases Group |
| Marja-Riitta Taskinen | Hospital District of Helsinki and Uusimaa, Helsinki, Finland                                                                                                                                | Clinical Groups | Cardiometabolic Diseases Group |
| Tiinamaija Tuomi      | Hospital District of Helsinki and Uusimaa, Helsinki, Finland                                                                                                                                | Clinical Groups | Cardiometabolic Diseases Group |
| Timo Hiltunen         | Hospital District of Helsinki and Uusimaa, Helsinki, Finland                                                                                                                                | Clinical Groups | Cardiometabolic Diseases Group |
| Jari Laukkanen        | Central Finland Health Care District, Jyväskylä, Finland                                                                                                                                    | Clinical Groups | Cardiometabolic Diseases Group |
| Amanda Elliott        | Institute for Molecular Medicine Finland (FIMM), HiLIFE, University of Helsinki, Helsinki, Finland; Broad Institute, Cambridge, MA, USA and Massachusetts General Hospital, Boston, MA, USA | Clinical Groups | Cardiometabolic Diseases Group |
| Mary Pat Reeve        | Institute for Molecular Medicine Finland (FIMM), HiLIFE, University of Helsinki, Helsinki, Finland                                                                                          | Clinical Groups | Cardiometabolic Diseases Group |
| Sanni Ruotsalainen    | Institute for Molecular Medicine Finland (FIMM), HiLIFE, University of Helsinki, Helsinki, Finland                                                                                          | Clinical Groups | Cardiometabolic Diseases Group |
| Benjamin Challis      | Astra Zeneca, Cambridge, United Kingdom                                                                                                                                                     | Clinical Groups | Cardiometabolic Diseases Group |
| Dirk Paul             | Astra Zeneca, Cambridge, United Kingdom                                                                                                                                                     | Clinical Groups | Cardiometabolic Diseases Group |
| Natalie Bowers        | Genentech, San Francisco, CA, United States                                                                                                                                                 | Clinical Groups | Cardiometabolic Diseases Group |
| Rion Pendergrass      | Genentech, San Francisco, CA, United States                                                                                                                                                 | Clinical Groups | Cardiometabolic Diseases Group |
| Audrey Chu            | GlaxoSmithKline, Brentford, United Kingdom                                                                                                                                                  | Clinical Groups | Cardiometabolic Diseases Group |
| Kirsi Auro            | GlaxoSmithKline, Espoo, Finland                                                                                                                                                             | Clinical Groups | Cardiometabolic Diseases Group |
| Dermot Reilly         | Janssen Research & Development, LLC, Boston, MA, United States                                                                                                                              | Clinical Groups | Cardiometabolic Diseases Group |
| Mike Mendelson        | Novartis, Boston, MA, United States                                                                                                                                                         | Clinical Groups | Cardiometabolic Diseases Group |
| Jaakko Parkkinen      | Pfizer, New York, NY, United States                                                                                                                                                         | Clinical Groups | Cardiometabolic Diseases Group |
| Melissa Miller        | Pfizer, New York, NY, United States                                                                                                                                                         | Clinical Groups | Cardiometabolic Diseases Group |
| Tuomo Meretoja        | Hospital District of Helsinki and Uusimaa, Helsinki, Finland                                                                                                                                | Clinical Groups | Oncology Group                 |
| Heikki Joensuu        | Hospital District of Helsinki and Uusimaa, Helsinki, Finland                                                                                                                                | Clinical Groups | Oncology Group                 |
| Olli Carpén           | Hospital District of Helsinki and Uusimaa, Helsinki, Finland                                                                                                                                | Clinical Groups | Oncology Group                 |
| Johanna Mattson       | Hospital District of Helsinki and Uusimaa, Helsinki, Finland                                                                                                                                | Clinical Groups | Oncology Group                 |
| Eveliina Salminen     | Hospital District of Helsinki and Uusimaa, Helsinki, Finland                                                                                                                                | Clinical Groups | Oncology Group                 |
| Annika Auranen        | Pirkanmaa Hospital District , Tampere, Finland                                                                                                                                              | Clinical Groups | Oncology Group                 |
| Peeter Karihtala      | Northern Ostrobothnia Hospital District, Oulu, Finland                                                                                                                                      | Clinical Groups | Oncology Group                 |
| Päivi Auvinen         | Northern Savo Hospital District, Kuopio, Finland                                                                                                                                            | Clinical Groups | Oncology Group                 |
| Klaus Elenius         | Hospital District of Southwest Finland, Turku, Finland                                                                                                                                      | Clinical Groups | Oncology Group                 |
| Johanna Schleutker    | Hospital District of Southwest Finland, Turku, Finland                                                                                                                                      | Clinical Groups | Oncology Group                 |
| Esa Pitkänen          | Institute for Molecular Medicine Finland (FIMM), HiLIFE, University of Helsinki, Helsinki, Finland                                                                                          | Clinical Groups | Oncology Group                 |
| Mark Daly             | Institute for Molecular Medicine Finland (FIMM), HiLIFE, University of Helsinki, Helsinki; Broad Institute of MIT and Harvard; Massachusetts General Hospital, Boston MA, United States     | Clinical Groups | Oncology Group                 |
| Nina Mars             | Institute for Molecular Medicine Finland (FIMM), HiLIFE, University of Helsinki, Helsinki, Finland                                                                                          | Clinical Groups | Oncology Group                 |
| Relja Popovic         | Abbvie, Chicago, IL, United States                                                                                                                                                          | Clinical Groups | Oncology Group                 |
| Jeffrey Waring        | Abbvie, Chicago, IL, United States                                                                                                                                                          | Clinical Groups | Oncology Group                 |
| Bridget Riley-Gillis  | Abbvie, Chicago, IL, United States                                                                                                                                                          | Clinical Groups | Oncology Group                 |
| Anne Lehtonen         | Abbvie, Chicago, IL, United States                                                                                                                                                          | Clinical Groups | Oncology Group                 |
| Jennifer Schutzman    | Genentech, San Francisco, CA, United States                                                                                                                                                 | Clinical Groups | Oncology Group                 |

|                          |                                                                                                                                               |                 |                     |
|--------------------------|-----------------------------------------------------------------------------------------------------------------------------------------------|-----------------|---------------------|
| Natalie Bowers           | Genentech, San Francisco, CA, United States                                                                                                   | Clinical Groups | Oncology Group      |
| Rion Pendergrass         | Genentech, San Francisco, CA, United States                                                                                                   | Clinical Groups | Oncology Group      |
| Diptee Kulkarni          | GlaxoSmithKline, Brentford, United Kingdom                                                                                                    | Clinical Groups | Oncology Group      |
| Kirsi Auro               | GlaxoSmithKline, Espoo, Finland                                                                                                               | Clinical Groups | Oncology Group      |
| Alessandro Porello       | Janssen Research & Development, LLC, Spring House, PA, United States                                                                          | Clinical Groups | Oncology Group      |
| Andrey Loboda            | Merck, Kenilworth, NJ, United States                                                                                                          | Clinical Groups | Oncology Group      |
| Heli Lehtonen            | Pfizer, New York, NY, United States                                                                                                           | Clinical Groups | Oncology Group      |
| Stefan McDonough         | Pfizer, New York, NY, United States                                                                                                           | Clinical Groups | Oncology Group      |
| Sauli Vuoti              | Janssen-Cilag Oy, Espoo, Finland                                                                                                              | Clinical Groups | Oncology Group      |
| Kai Kaarniranta          | Northern Savo Hospital District, Kuopio, Finland                                                                                              | Clinical Groups | Ophthalmology Group |
| Joni A Turunen           | Helsinki University Hospital and University of Helsinki, Helsinki, Finland; Eye Genetics Group, Folkhälsan Research Center, Helsinki, Finland | Clinical Groups | Ophthalmology Group |
| Terhi Ollila             | Hospital District of Helsinki and Uusimaa, Helsinki, Finland                                                                                  | Clinical Groups | Ophthalmology Group |
| Hannu Uusitalo           | Pirkanmaa Hospital District, Tampere, Finland                                                                                                 | Clinical Groups | Ophthalmology Group |
| Esa Pitkänen             | Institute for Molecular Medicine Finland (FIMM), HiLIFE, University of Helsinki, Helsinki, Finland                                            | Clinical Groups | Ophthalmology Group |
| Juha Karjalainen         | Institute for Molecular Medicine Finland (FIMM), HiLIFE, University of Helsinki, Helsinki, Finland                                            | Clinical Groups | Ophthalmology Group |
| Mengzhen Liu             | Abbvie, Chicago, IL, United States                                                                                                            | Clinical Groups | Ophthalmology Group |
| Heiko Runz               | Biogen, Cambridge, MA, United States                                                                                                          | Clinical Groups | Ophthalmology Group |
| Stephanie Loomis s       | Biogen, Cambridge, MA, United State                                                                                                           | Clinical Groups | Ophthalmology Group |
| Erich Strauss            | Genentech, San Francisco, CA, United States                                                                                                   | Clinical Groups | Ophthalmology Group |
| Natalie Bowers           | Genentech, San Francisco, CA, United States                                                                                                   | Clinical Groups | Ophthalmology Group |
| Hao Chen                 | Genentech, San Francisco, CA, United States                                                                                                   | Clinical Groups | Ophthalmology Group |
| Rion Pendergrass         | Genentech, San Francisco, CA, United States                                                                                                   | Clinical Groups | Ophthalmology Group |
| Kaisa Tasanen            | Northern Ostrobothnia Hospital District, Oulu, Finland                                                                                        | Clinical Groups | Dermatology Group   |
| Laura Huilaja            | Northern Ostrobothnia Hospital District, Oulu, Finland                                                                                        | Clinical Groups | Dermatology Group   |
| Katariina Hannula-Jouppi | Hospital District of Helsinki and Uusimaa, Helsinki, Finland                                                                                  | Clinical Groups | Dermatology Group   |
| Teea Salmi               | Pirkanmaa Hospital District, Tampere, Finland                                                                                                 | Clinical Groups | Dermatology Group   |
| Sirkku Peltonen          | Hospital District of Southwest Finland, Turku, Finland                                                                                        | Clinical Groups | Dermatology Group   |
| Leena Koulu              | Hospital District of Southwest Finland, Turku, Finland                                                                                        | Clinical Groups | Dermatology Group   |
| Nizar Smaoui             | Abbvie, Chicago, IL, United States                                                                                                            | Clinical Groups | Dermatology Group   |
| Fedik Rahimov            | Abbvie, Chicago, IL, United States                                                                                                            | Clinical Groups | Dermatology Group   |
| Anne Lehtonen            | Abbvie, Chicago, IL, United States                                                                                                            | Clinical Groups | Dermatology Group   |
| David Choy               | Genentech, San Francisco, CA, United States                                                                                                   | Clinical Groups | Dermatology Group   |
| Rion Pendergrass         | Genentech, San Francisco, CA, United States                                                                                                   | Clinical Groups | Dermatology Group   |
| Dawn Waterworth          | Janssen Research & Development, LLC, Spring House, PA, United States                                                                          | Clinical Groups | Dermatology Group   |
| Kirsi Kalpala            | Pfizer, New York, NY, United States                                                                                                           | Clinical Groups | Dermatology Group   |
| Ying Wu                  | Pfizer, New York, NY, United States                                                                                                           | Clinical Groups | Dermatology Group   |
| Pirkko Pussinen          | Hospital District of Helsinki and Uusimaa, Helsinki, Finland                                                                                  | Clinical Groups | Odontology Group    |
| Aino Salminen            | Hospital District of Helsinki and Uusimaa, Helsinki, Finland                                                                                  | Clinical Groups | Odontology Group    |
| Tuula Salo               | Hospital District of Helsinki and Uusimaa, Helsinki, Finland                                                                                  | Clinical Groups | Odontology Group    |
| David Rice               | Hospital District of Helsinki and Uusimaa, Helsinki, Finland                                                                                  | Clinical Groups | Odontology Group    |
| Pekka Nieminen           | Hospital District of Helsinki and Uusimaa, Helsinki, Finland                                                                                  | Clinical Groups | Odontology Group    |
| Ulla Palotie             | Hospital District of Helsinki and Uusimaa, Helsinki, Finland                                                                                  | Clinical Groups | Odontology Group    |
| Maria Siponen            | Northern Savo Hospital District, Kuopio, Finland                                                                                              | Clinical Groups | Odontology Group    |
| Liisa Suominen           | Northern Savo Hospital District, Kuopio, Finland                                                                                              | Clinical Groups | Odontology Group    |

|                         |                                                                                                                                                                                             |                 |                                       |
|-------------------------|---------------------------------------------------------------------------------------------------------------------------------------------------------------------------------------------|-----------------|---------------------------------------|
| Päivi Mäntylä           | Northern Savo Hospital District, Kuopio, Finland                                                                                                                                            | Clinical Groups | Odontology Group                      |
| Ulvi Gursoy             | Hospital District of Southwest Finland, Turku, Finland                                                                                                                                      | Clinical Groups | Odontology Group                      |
| Vuokko Anttonen         | Northern Ostrobothnia Hospital District, Oulu, Finland                                                                                                                                      | Clinical Groups | Odontology Group                      |
| Kirsi Sipilä            | Research Unit of Oral Health Sciences Faculty of Medicine, University of Oulu, Oulu, Finland; Medical Research Center, Oulu, Oulu University Hospital and University of Oulu, Oulu, Finland | Clinical Groups | Odontology Group                      |
| Rion Pendergrass        | Genentech, San Francisco, CA, United States                                                                                                                                                 | Clinical Groups | Odontology Group                      |
| Hannele Laivuori        | Institute for Molecular Medicine Finland (FIMM), HiLIFE, University of Helsinki, Helsinki, Finland                                                                                          | Clinical Groups | Women's Health and Reproduction Group |
| Venla Kurra             | Pirkanmaa Hospital District, Tampere, Finland                                                                                                                                               | Clinical Groups | Women's Health and Reproduction Group |
| Laura Kotaniemi-Talonen | Pirkanmaa Hospital District, Tampere, Finland                                                                                                                                               | Clinical Groups | Women's Health and Reproduction Group |
| Oskari Heikinheimo      | Hospital District of Helsinki and Uusimaa, Helsinki, Finland                                                                                                                                | Clinical Groups | Women's Health and Reproduction Group |
| Ilkka Kalliala          | Hospital District of Helsinki and Uusimaa, Helsinki, Finland                                                                                                                                | Clinical Groups | Women's Health and Reproduction Group |
| Lauri Aaltonen          | Hospital District of Helsinki and Uusimaa, Helsinki, Finland                                                                                                                                | Clinical Groups | Women's Health and Reproduction Group |
| Varpu Jokimaa           | Hospital District of Southwest Finland, Turku, Finland                                                                                                                                      | Clinical Groups | Women's Health and Reproduction Group |
| Terhi Pilttonen         | Northern Ostrobothnia Hospital District, Oulu, Finland                                                                                                                                      | Clinical Groups | Women's Health and Reproduction Group |
| Johannes Kettunen       | Northern Ostrobothnia Hospital District, Oulu, Finland                                                                                                                                      | Clinical Groups | Women's Health and Reproduction Group |
| Marja Vääräsmäki        | Northern Ostrobothnia Hospital District, Oulu, Finland                                                                                                                                      | Clinical Groups | Women's Health and Reproduction Group |
| Outi Uimari             | Northern Ostrobothnia Hospital District, Oulu, Finland                                                                                                                                      | Clinical Groups | Women's Health and Reproduction Group |
| Laure Morin-Papunen     | Northern Ostrobothnia Hospital District, Oulu, Finland                                                                                                                                      | Clinical Groups | Women's Health and Reproduction Group |
| Maarit Niinimäki        | Northern Ostrobothnia Hospital District, Oulu, Finland                                                                                                                                      | Clinical Groups | Women's Health and Reproduction Group |
| Katja Kivinen           | Institute for Molecular Medicine Finland (FIMM), HiLIFE, University of Helsinki, Helsinki, Finland                                                                                          | Clinical Groups | Women's Health and Reproduction Group |
| Elisabeth Widen         | Institute for Molecular Medicine Finland (FIMM), HiLIFE, University of Helsinki, Helsinki, Finland                                                                                          | Clinical Groups | Women's Health and Reproduction Group |
| Mary Pat Reeve          | Institute for Molecular Medicine Finland (FIMM), HiLIFE, University of Helsinki, Helsinki, Finland                                                                                          | Clinical Groups | Women's Health and Reproduction Group |
| Mark Daly               | Institute for Molecular Medicine Finland (FIMM), HiLIFE, University of Helsinki, Helsinki; Broad Institute of MIT and Harvard; Massachusetts General Hospital, Boston MA, United States     | Clinical Groups | Women's Health and Reproduction Group |
| Taru Tukiainen          | Institute for Molecular Medicine Finland (FIMM), HiLIFE, University of Helsinki, Helsinki, Finland                                                                                          | Clinical Groups | Women's Health and Reproduction Group |
| Niko Välimäki           | University of Helsinki, Helsinki, Finland                                                                                                                                                   | Clinical Groups | Women's Health and Reproduction Group |
| Eija Laakkonen          | University of Jyväskylä, Jyväskylä, Finland                                                                                                                                                 | Clinical Groups | Women's Health and Reproduction Group |
| Jaakko Tyrmi            | University of Oulu, Oulu, Finland / University of Tampere, Tampere, Finland                                                                                                                 | Clinical Groups | Women's Health and Reproduction Group |
| Heidi Silven            | University of Oulu, Oulu, Finland                                                                                                                                                           | Clinical Groups | Women's Health and Reproduction Group |
| Eeva Sliz               | University of Oulu, Oulu, Finland                                                                                                                                                           | Clinical Groups | Women's Health and Reproduction Group |
| Riikka Arffman          | University of Oulu, Oulu, Finland                                                                                                                                                           | Clinical Groups | Women's Health and Reproduction Group |
| Susanna Savukoski       | University of Oulu, Oulu, Finland                                                                                                                                                           | Clinical Groups | Women's Health and Reproduction Group |
| Triin Laisk             | Estonian biobank, Tartu, Estonia                                                                                                                                                            | Clinical Groups | Women's Health and Reproduction Group |
| Natalia Pujol           | Estonian biobank, Tartu, Estonia                                                                                                                                                            | Clinical Groups | Women's Health and Reproduction Group |
| Mengzhen Liu            | Abbvie, Chicago, IL, United States                                                                                                                                                          | Clinical Groups | Women's Health and Reproduction Group |
| Bridget Riley-Gillis    | Abbvie, Chicago, IL, United States                                                                                                                                                          | Clinical Groups | Women's Health and Reproduction Group |
| Rion Pendergrass        | Genentech, San Francisco, CA, United States                                                                                                                                                 | Clinical Groups | Women's Health and Reproduction Group |
| Janet Kumar             | GlaxoSmithKline, Collegeville, PA, United States                                                                                                                                            | Clinical Groups | Women's Health and Reproduction Group |
| Kirsi Auro              | GlaxoSmithKline, Espoo, Finland                                                                                                                                                             | Clinical Groups | Women's Health and Reproduction Group |
| Iiris Hovatta           | University of Helsinki, Finland                                                                                                                                                             | Clinical Groups | Depression group                      |
| Chia-Yen Chen           | Biogen, Cambridge, MA, United States                                                                                                                                                        | Clinical Groups | Depression group                      |
| Erkki Isometsä          | Hospital District of Helsinki and Uusimaa, Helsinki, Finland                                                                                                                                | Clinical Groups | Depression group                      |
| Hanna Ollila            | Institute for Molecular Medicine Finland (FIMM), HiLIFE, University of Helsinki, Helsinki, Finland                                                                                          | Clinical Groups | Depression group                      |
| Jaana Suvisaari         | Finnish Institute for Health and Welfare (THL), Helsinki, Finland                                                                                                                           | Clinical Groups | Depression group                      |
| Thomas Damm Als         | Aarhus University, Denmark                                                                                                                                                                  | Clinical Groups | Depression group                      |
| Antti Mäkitie           | Department of Otorhinolaryngology - Head and Neck Surgery, University of Helsinki and Helsinki University Hospital, Helsinki, Finland                                                       | Clinical Groups | ENT (ear, nose and throat) Group      |

|                             |                                                                                                                                                                                         |                                |                                       |
|-----------------------------|-----------------------------------------------------------------------------------------------------------------------------------------------------------------------------------------|--------------------------------|---------------------------------------|
| Argyro Bizaki-Vallaskanga   | Pirkanmaa Hospital District, Tampere, Finland                                                                                                                                           | Clinical Groups                | ENT (ear, nose and throat) Group      |
| Sanna Toppila-Salmi         | University of Helsinki, Finland                                                                                                                                                         | Clinical Groups                | ENT (ear, nose and throat) Group      |
| Elmo Saarentaus             | Institute for Molecular Medicine Finland (FIMM), HiLIFE, University of Helsinki, Helsinki, Finland                                                                                      | Clinical Groups                | ENT (ear, nose and throat) Group      |
| Tytti Willberg              | Hospital District of Southwest Finland, Turku, Finland                                                                                                                                  | Clinical Groups                | ENT (ear, nose and throat) Group      |
| Antti Aarnisalo             | Hospital District of Helsinki and Uusimaa, Helsinki, Finland                                                                                                                            | Clinical Groups                | ENT (ear, nose and throat) Group      |
| Eveliina Salminen           | Hospital District of Helsinki and Uusimaa, Helsinki, Finland                                                                                                                            | Clinical Groups                | ENT (ear, nose and throat) Group      |
| Elisa Rahikkala             | Northern Ostrobothnia Hospital District, Oulu, Finland                                                                                                                                  | Clinical Groups                | ENT (ear, nose and throat) Group      |
| Johannes Kettunen           | Northern Ostrobothnia Hospital District, Oulu, Finland                                                                                                                                  | Clinical Groups                | ENT (ear, nose and throat) Group      |
| Kristiina Aittomäki         | Department of Medical Genetics, Helsinki University Central Hospital, Helsinki, Finland                                                                                                 | Clinical Groups                | POI (premature ovarian failure) Group |
| Fredrik Åberg               | Transplantation and Liver Surgery Clinic, Helsinki University Hospital, Helsinki University, Helsinki, Finland                                                                          | Clinical Groups                | LiverScore Group                      |
| Aarno Palotie               | Institute for Molecular Medicine, Finland (FIMM), HiLIFE, University of Helsinki, Helsinki, Finland; Broad Institute of MIT and Harvard; Massachusetts General Hospital                 | FinnGen Analysis working group | FinnGen Analysis working group        |
| Mark Daly                   | Institute for Molecular Medicine Finland (FIMM), HiLIFE, University of Helsinki, Helsinki; Broad Institute of MIT and Harvard; Massachusetts General Hospital, Boston MA, United States | FinnGen Analysis working group | FinnGen Analysis working group        |
| Samuli Ripatti              | Institute for Molecular Medicine Finland (FIMM), HiLIFE, University of Helsinki, Helsinki, Finland                                                                                      | FinnGen Analysis working group | FinnGen Analysis working group        |
| Aki Havulinna               | Institute for Molecular Medicine Finland (FIMM), HiLIFE, University of Helsinki, Helsinki, Finland                                                                                      | FinnGen Analysis working group | FinnGen Analysis working group        |
| Mitja Kurki                 | Institute for Molecular Medicine Finland (FIMM), HiLIFE, University of Helsinki, Helsinki, Finland                                                                                      | FinnGen Analysis working group | FinnGen Analysis working group        |
| Juha Mehtonen               | Institute for Molecular Medicine Finland (FIMM), HiLIFE, University of Helsinki, Helsinki, Finland                                                                                      | FinnGen Analysis working group | FinnGen Analysis working group        |
| Priit Palta                 | Institute for Molecular Medicine Finland (FIMM), HiLIFE, University of Helsinki, Helsinki, Finland                                                                                      | FinnGen Analysis working group | FinnGen Analysis working group        |
| Juha Karjalainen            | Institute for Molecular Medicine Finland (FIMM), HiLIFE, University of Helsinki, Helsinki, Finland                                                                                      | FinnGen Analysis working group | FinnGen Analysis working group        |
| Pietro Della Briotta Parolo | Institute for Molecular Medicine Finland (FIMM), HiLIFE, University of Helsinki, Helsinki, Finland                                                                                      | FinnGen Analysis working group | FinnGen Analysis working group        |
| Wei Zhou                    | Broad Institute, Cambridge, MA, United States                                                                                                                                           | FinnGen Analysis working group | FinnGen Analysis working group        |
| Mutaamba Maasha             | Broad Institute, Cambridge, MA, United States                                                                                                                                           | FinnGen Analysis working group | FinnGen Analysis working group        |
| Susanna Lemmelä             | Institute for Molecular Medicine Finland (FIMM), HiLIFE, University of Helsinki, Helsinki, Finland                                                                                      | FinnGen Analysis working group | FinnGen Analysis working group        |
| Manuel Rivas                | University of Stanford, Stanford, CA, United States                                                                                                                                     | FinnGen Analysis working group | FinnGen Analysis working group        |
| Aoxing Liu                  | Institute for Molecular Medicine Finland (FIMM), HiLIFE, University of Helsinki, Helsinki, Finland                                                                                      | FinnGen Analysis working group | FinnGen Analysis working group        |
| Arto Lehisto                | Institute for Molecular Medicine Finland (FIMM), HiLIFE, University of Helsinki, Helsinki, Finland                                                                                      | FinnGen Analysis working group | FinnGen Analysis working group        |
| Andrea Ganna                | Institute for Molecular Medicine Finland (FIMM), HiLIFE, University of Helsinki, Helsinki, Finland                                                                                      | FinnGen Analysis working group | FinnGen Analysis working group        |
| Vincent Llorens             | Institute for Molecular Medicine Finland (FIMM), HiLIFE, University of Helsinki, Helsinki, Finland                                                                                      | FinnGen Analysis working group | FinnGen Analysis working group        |
| Hannele Laivuori            | Institute for Molecular Medicine Finland (FIMM), HiLIFE, University of Helsinki, Helsinki, Finland                                                                                      | FinnGen Analysis working group | FinnGen Analysis working group        |
| Mary Pat Reeve              | Institute for Molecular Medicine Finland (FIMM), HiLIFE, University of Helsinki, Helsinki, Finland                                                                                      | FinnGen Analysis working group | FinnGen Analysis working group        |
| Henrike Heyne               | Institute for Molecular Medicine Finland (FIMM), HiLIFE, University of Helsinki, Helsinki, Finland                                                                                      | FinnGen Analysis working group | FinnGen Analysis working group        |
| Nina Mars                   | Institute for Molecular Medicine Finland (FIMM), HiLIFE, University of Helsinki, Helsinki, Finland                                                                                      | FinnGen Analysis working group | FinnGen Analysis working group        |
| Joel Rämö                   | Institute for Molecular Medicine Finland (FIMM), HiLIFE, University of Helsinki, Helsinki, Finland                                                                                      | FinnGen Analysis working group | FinnGen Analysis working group        |
| Hanna Ollila                | Institute for Molecular Medicine Finland (FIMM), HiLIFE, University of Helsinki, Helsinki, Finland                                                                                      | FinnGen Analysis working group | FinnGen Analysis working group        |
| Elmo Saarentaus             | Institute for Molecular Medicine Finland (FIMM), HiLIFE, University of Helsinki, Helsinki, Finland                                                                                      | FinnGen Analysis working group | FinnGen Analysis working group        |
| Rodos Rodosthenous          | Institute for Molecular Medicine Finland (FIMM), HiLIFE, University of Helsinki, Helsinki, Finland                                                                                      | FinnGen Analysis working group | FinnGen Analysis working group        |
| Shabbeer Hassan             | Institute for Molecular Medicine Finland (FIMM), HiLIFE, University of Helsinki, Helsinki, Finland                                                                                      | FinnGen Analysis working group | FinnGen Analysis working group        |
| Satu Strausz                | Institute for Molecular Medicine Finland (FIMM), HiLIFE, University of Helsinki, Helsinki, Finland                                                                                      | FinnGen Analysis working group | FinnGen Analysis working group        |
| Taru Tukiainen              | Institute for Molecular Medicine Finland (FIMM), HiLIFE, University of Helsinki, Helsinki, Finland                                                                                      | FinnGen Analysis working group | FinnGen Analysis working group        |
| Tuula Palotie               | University of Helsinki and Hospital District of Helsinki and Uusimaa, Helsinki, Finland                                                                                                 | FinnGen Analysis working group | FinnGen Analysis working group        |
| Kimmo Palin                 | University of Helsinki, Helsinki, Finland                                                                                                                                               | FinnGen Analysis working group | FinnGen Analysis working group        |
| Javier Garcia-Tabuenca      | University of Tampere, Tampere, Finland                                                                                                                                                 | FinnGen Analysis working group | FinnGen Analysis working group        |
| Harri Siirtola              | University of Tampere, Tampere, Finland                                                                                                                                                 | FinnGen Analysis working group | FinnGen Analysis working group        |
| Tuomo Kiiskinen             | Institute for Molecular Medicine Finland (FIMM), HiLIFE, University of Helsinki, Helsinki, Finland                                                                                      | FinnGen Analysis working group | FinnGen Analysis working group        |
| Jiwoo Lee                   | Institute for Molecular Medicine Finland (FIMM), HiLIFE, University of Helsinki, Helsinki, Finland; Broad Institute, Cambridge, MA, United States                                       | FinnGen Analysis working group | FinnGen Analysis working group        |

|                             |                                                                                                                                                                                             |                                |                                |
|-----------------------------|---------------------------------------------------------------------------------------------------------------------------------------------------------------------------------------------|--------------------------------|--------------------------------|
| Kristin Tsuo                | Institute for Molecular Medicine Finland (FIMM), HiLIFE, University of Helsinki, Helsinki, Finland; Broad Institute, Cambridge, MA, United States                                           | FinnGen Analysis working group | FinnGen Analysis working group |
| Amanda Elliott              | Institute for Molecular Medicine Finland (FIMM), HiLIFE, University of Helsinki, Helsinki, Finland; Broad Institute, Cambridge, MA, USA and Massachusetts General Hospital, Boston, MA, USA | FinnGen Analysis working group | FinnGen Analysis working group |
| Kati Kristiansson           | THL Biobank / Finnish Institute for Health and Welfare (THL), Helsinki, Finland                                                                                                             | FinnGen Analysis working group | FinnGen Analysis working group |
| Mikko Arvas                 | Finnish Red Cross Blood Service / Finnish Hematology Registry and Clinical Biobank, Helsinki, Finland                                                                                       | FinnGen Analysis working group | FinnGen Analysis working group |
| Kati Hyvärinen              | Finnish Red Cross Blood Service, Helsinki, Finland                                                                                                                                          | FinnGen Analysis working group | FinnGen Analysis working group |
| Jarmo Ritari                | Finnish Red Cross Blood Service, Helsinki, Finland                                                                                                                                          | FinnGen Analysis working group | FinnGen Analysis working group |
| Olli Carpén                 | Helsinki Biobank / Helsinki University and Hospital District of Helsinki and Uusimaa, Helsinki                                                                                              | FinnGen Analysis working group | FinnGen Analysis working group |
| Johannes Kettunen           | Northern Finland Biobank Borealis / University of Oulu / Northern Ostrobothnia Hospital District, Oulu, Finland                                                                             | FinnGen Analysis working group | FinnGen Analysis working group |
| Katri Pylkäs                | University of Oulu, Oulu, Finland                                                                                                                                                           | FinnGen Analysis working group | FinnGen Analysis working group |
| Eeva Sliz                   | University of Oulu, Oulu, Finland                                                                                                                                                           | FinnGen Analysis working group | FinnGen Analysis working group |
| Minna Karjalainen           | University of Oulu, Oulu, Finland                                                                                                                                                           | FinnGen Analysis working group | FinnGen Analysis working group |
| Tuomo Mantere               | Northern Finland Biobank Borealis / University of Oulu / Northern Ostrobothnia Hospital District, Oulu, Finland                                                                             | FinnGen Analysis working group | FinnGen Analysis working group |
| Eeva Kangasniemi            | Finnish Clinical Biobank Tampere / University of Tampere / Pirkanmaa Hospital District, Tampere, Finland                                                                                    | FinnGen Analysis working group | FinnGen Analysis working group |
| Sami Heikkinen              | University of Eastern Finland, Kuopio, Finland                                                                                                                                              | FinnGen Analysis working group | FinnGen Analysis working group |
| Arto Mannermaa              | Biobank of Eastern Finland / University of Eastern Finland / Northern Savo Hospital District, Kuopio, Finland                                                                               | FinnGen Analysis working group | FinnGen Analysis working group |
| Eija Laakkonen              | University of Jyväskylä, Jyväskylä, Finland                                                                                                                                                 | FinnGen Analysis working group | FinnGen Analysis working group |
| Nina Pitkänen               | Auria Biobank / University of Turku / Hospital District of Southwest Finland, Turku, Finland                                                                                                | FinnGen Analysis working group | FinnGen Analysis working group |
| Samuel Lessard              | Translational Sciences, Sanofi R&D, Framingham, MA, USA                                                                                                                                     | FinnGen Analysis working group | FinnGen Analysis working group |
| Clément Chatelain           | Translational Sciences, Sanofi R&D, Framingham, MA, USA                                                                                                                                     | FinnGen Analysis working group | FinnGen Analysis working group |
| Perttu Terho                | Auria Biobank / University of Turku / Hospital District of Southwest Finland, Turku, Finland                                                                                                | Biobank directors              | Biobank directors              |
| Tiina Wahlfors              | THL Biobank / Finnish Institute for Health and Welfare (THL), Helsinki, Finland                                                                                                             | Biobank directors              | Biobank directors              |
| Jukka Partanen              | Finnish Red Cross Blood Service / Finnish Hematology Registry and Clinical Biobank, Helsinki, Finland                                                                                       | Biobank directors              | Biobank directors              |
| Eero Punkka                 | Helsinki Biobank / Helsinki University and Hospital District of Helsinki and Uusimaa, Helsinki                                                                                              | Biobank directors              | Biobank directors              |
| Raisa Serpi                 | Northern Finland Biobank Borealis / University of Oulu / Northern Ostrobothnia Hospital District, Oulu, Finland                                                                             | Biobank directors              | Biobank directors              |
| Sanna Siltanen              | Finnish Clinical Biobank Tampere / University of Tampere / Pirkanmaa Hospital District, Tampere, Finland                                                                                    | Biobank directors              | Biobank directors              |
| Veli-Matti Kosma            | Biobank of Eastern Finland / University of Eastern Finland / Northern Savo Hospital District, Kuopio, Finland                                                                               | Biobank directors              | Biobank directors              |
| Teijo Kuopio                | Central Finland Biobank / University of Jyväskylä / Central Finland Health Care District, Jyväskylä, Finland                                                                                | Biobank directors              | Biobank directors              |
| Anu Jalanko                 | Institute for Molecular Medicine Finland (FIMM), HiLIFE, University of Helsinki, Helsinki, Finland                                                                                          | FinnGen Teams                  | Administration                 |
| Huei-Yi Shen                | Institute for Molecular Medicine Finland (FIMM), HiLIFE, University of Helsinki, Helsinki, Finland                                                                                          | FinnGen Teams                  | Administration                 |
| Risto Kajanne               | Institute for Molecular Medicine Finland (FIMM), HiLIFE, University of Helsinki, Helsinki, Finland                                                                                          | FinnGen Teams                  | Administration                 |
| Mervi Aavikko               | Institute for Molecular Medicine Finland (FIMM), HiLIFE, University of Helsinki, Helsinki, Finland                                                                                          | FinnGen Teams                  | Administration                 |
| Henna Palin                 | Finnish Clinical Biobank Tampere / University of Tampere / Pirkanmaa Hospital District, Tampere, Finland                                                                                    | FinnGen Teams                  | Administration                 |
| Malla-Maria Linna           | Helsinki Biobank / Helsinki University and Hospital District of Helsinki and Uusimaa, Helsinki                                                                                              | FinnGen Teams                  | Administration                 |
| Juha Karjalainen            | Institute for Molecular Medicine Finland (FIMM), HiLIFE, University of Helsinki, Helsinki, Finland                                                                                          | FinnGen Teams                  | Analysis                       |
| Mitja Kurki                 | Institute for Molecular Medicine Finland (FIMM), HiLIFE, University of Helsinki, Helsinki, Finland                                                                                          | FinnGen Teams                  | Analysis                       |
| Pietro Della Briotta Parolo | Institute for Molecular Medicine Finland (FIMM), HiLIFE, University of Helsinki, Helsinki, Finland                                                                                          | FinnGen Teams                  | Analysis                       |
| Arto Lehisto                | Institute for Molecular Medicine Finland (FIMM), HiLIFE, University of Helsinki, Helsinki, Finland                                                                                          | FinnGen Teams                  | Analysis                       |
| Juha Mehtonen               | Institute for Molecular Medicine Finland (FIMM), HiLIFE, University of Helsinki, Helsinki, Finland                                                                                          | FinnGen Teams                  | Analysis                       |
| Wei Zhou                    | Broad Institute, Cambridge, MA, United States                                                                                                                                               | FinnGen Teams                  | Analysis                       |
| Masahiro Kanai              | Broad Institute, Cambridge, MA, United States                                                                                                                                               | FinnGen Teams                  | Analysis                       |
| Mutaamba Maasha             | Broad Institute, Cambridge, MA, United States                                                                                                                                               | FinnGen Teams                  | Analysis                       |
| Zhili Zheng                 | Broad Institute, Cambridge, MA, United States                                                                                                                                               | FinnGen Teams                  | Analysis                       |
| Hannele Laivuori            | Institute for Molecular Medicine Finland (FIMM), HiLIFE, University of Helsinki, Helsinki, Finland                                                                                          | FinnGen Teams                  | Clinical Endpoint Development  |
| Aki Havulinna               | Institute for Molecular Medicine Finland (FIMM), HiLIFE, University of Helsinki, Helsinki, Finland                                                                                          | FinnGen Teams                  | Clinical Endpoint Development  |

|                          |                                                                                                    |               |                                |
|--------------------------|----------------------------------------------------------------------------------------------------|---------------|--------------------------------|
| Susanna Lemmelä          | Institute for Molecular Medicine Finland (FIMM), HiLIFE, University of Helsinki, Helsinki, Finland | FinnGen Teams | Clinical Endpoint Development  |
| Tuomo Kiiskinen          | Institute for Molecular Medicine Finland (FIMM), HiLIFE, University of Helsinki, Helsinki, Finland | FinnGen Teams | Clinical Endpoint Development  |
| Elisa Lahtela            | Institute for Molecular Medicine Finland (FIMM), HiLIFE, University of Helsinki, Helsinki, Finland | FinnGen Teams | Clinical Endpoint Development  |
| Mari Kaunisto            | Institute for Molecular Medicine Finland (FIMM), HiLIFE, University of Helsinki, Helsinki, Finland | FinnGen Teams | Communication                  |
| Elina Kilpeläinen        | Institute for Molecular Medicine Finland (FIMM), HiLIFE, University of Helsinki, Helsinki, Finland | FinnGen Teams | E-Science                      |
| Timo P. Sipilä           | Institute for Molecular Medicine Finland (FIMM), HiLIFE, University of Helsinki, Helsinki, Finland | FinnGen Teams | E-Science                      |
| Oluwaseun Alexander Dad  | Institute for Molecular Medicine Finland (FIMM), HiLIFE, University of Helsinki, Helsinki, Finland | FinnGen Teams | E-Science                      |
| Awaisa Ghazal            | Institute for Molecular Medicine Finland (FIMM), HiLIFE, University of Helsinki, Helsinki, Finland | FinnGen Teams | E-Science                      |
| Anastasia Kytölä         | Institute for Molecular Medicine Finland (FIMM), HiLIFE, University of Helsinki, Helsinki, Finland | FinnGen Teams | E-Science                      |
| Sanni Ruotsalainen       | Institute for Molecular Medicine Finland (FIMM), HiLIFE, University of Helsinki, Helsinki, Finland | FinnGen Teams | E-Science                      |
| Rigbe Weldatsadik        | Institute for Molecular Medicine Finland (FIMM), HiLIFE, University of Helsinki, Helsinki, Finland | FinnGen Teams | E-Science                      |
| Kati Donner              | Institute for Molecular Medicine Finland (FIMM), HiLIFE, University of Helsinki, Helsinki, Finland | FinnGen Teams | Genotyping                     |
| Timo P. Sipilä           | Institute for Molecular Medicine Finland (FIMM), HiLIFE, University of Helsinki, Helsinki, Finland | FinnGen Teams | Genotyping                     |
| Anu Loukola              | Helsinki Biobank / Helsinki University and Hospital District of Helsinki and Uusimaa, Helsinki     | FinnGen Teams | Sample Collection Coordination |
| Päivi Laiho              | THL Biobank / Finnish Institute for Health and Welfare (THL), Helsinki, Finland                    | FinnGen Teams | Sample Logistics               |
| Tuuli Sistonen           | THL Biobank / Finnish Institute for Health and Welfare (THL), Helsinki, Finland                    | FinnGen Teams | Sample Logistics               |
| Essi Kaiharju            | THL Biobank / Finnish Institute for Health and Welfare (THL), Helsinki, Finland                    | FinnGen Teams | Sample Logistics               |
| Markku Laukkanen         | THL Biobank / Finnish Institute for Health and Welfare (THL), Helsinki, Finland                    | FinnGen Teams | Sample Logistics               |
| Elina Järvensivu         | THL Biobank / Finnish Institute for Health and Welfare (THL), Helsinki, Finland                    | FinnGen Teams | Sample Logistics               |
| Sini Lähteenmäki         | THL Biobank / Finnish Institute for Health and Welfare (THL), Helsinki, Finland                    | FinnGen Teams | Sample Logistics               |
| Lotta Männikkö           | THL Biobank / Finnish Institute for Health and Welfare (THL), Helsinki, Finland                    | FinnGen Teams | Sample Logistics               |
| Regis Wong               | THL Biobank / Finnish Institute for Health and Welfare (THL), Helsinki, Finland                    | FinnGen Teams | Sample Logistics               |
| Auli Toivola             | THL Biobank / Finnish Institute for Health and Welfare (THL), Helsinki, Finland                    | FinnGen Teams | Sample Logistics               |
| Minna Brunfeldt          | THL Biobank / Finnish Institute for Health and Welfare (THL), Helsinki, Finland                    | FinnGen Teams | Registry Data Operations       |
| Hannele Mattsson         | THL Biobank / Finnish Institute for Health and Welfare (THL), Helsinki, Finland                    | FinnGen Teams | Registry Data Operations       |
| Kati Kristiansson        | THL Biobank / Finnish Institute for Health and Welfare (THL), Helsinki, Finland                    | FinnGen Teams | Registry Data Operations       |
| Susanna Lemmelä          | Institute for Molecular Medicine Finland (FIMM), HiLIFE, University of Helsinki, Helsinki, Finland | FinnGen Teams | Registry Data Operations       |
| Sami Koskelainen         | THL Biobank / Finnish Institute for Health and Welfare (THL), Helsinki, Finland                    | FinnGen Teams | Registry Data Operations       |
| Tero Hiekkalinna         | THL Biobank / Finnish Institute for Health and Welfare (THL), Helsinki, Finland                    | FinnGen Teams | Registry Data Operations       |
| Teemu Paajanen           | THL Biobank / Finnish Institute for Health and Welfare (THL), Helsinki, Finland                    | FinnGen Teams | Registry Data Operations       |
| Priit Palta              | Institute for Molecular Medicine Finland (FIMM), HiLIFE, University of Helsinki, Helsinki, Finland | FinnGen Teams | Sequencing Informatics         |
| Kalle Pärn               | Institute for Molecular Medicine Finland (FIMM), HiLIFE, University of Helsinki, Helsinki, Finland | FinnGen Teams | Sequencing Informatics         |
| Mart Kals                | Institute for Molecular Medicine Finland (FIMM), HiLIFE, University of Helsinki, Helsinki, Finland | FinnGen Teams | Sequencing Informatics         |
| Shuang Luo               | Institute for Molecular Medicine Finland (FIMM), HiLIFE, University of Helsinki, Helsinki, Finland | FinnGen Teams | Sequencing Informatics         |
| Tarja Laitinen           | Pirkanmaa Hospital District, Tampere, Finland                                                      | FinnGen Teams | Trajectory                     |
| Mary Pat Reeve           | Institute for Molecular Medicine Finland (FIMM), HiLIFE, University of Helsinki, Helsinki, Finland | FinnGen Teams | Trajectory                     |
| Shanmukha Sampath Padsam | Institute for Molecular Medicine Finland (FIMM), HiLIFE, University of Helsinki, Helsinki, Finland | FinnGen Teams | Trajectory                     |
| Marianna Niemi           | University of Tampere, Tampere, Finland                                                            | FinnGen Teams | Trajectory                     |
| Harri Siirtola           | University of Tampere, Tampere, Finland                                                            | FinnGen Teams | Trajectory                     |
| Javier Gracia-Tabuenca   | University of Tampere, Tampere, Finland                                                            | FinnGen Teams | Trajectory                     |
| Mika Helminen            | University of Tampere, Tampere, Finland                                                            | FinnGen Teams | Trajectory                     |
| Tiina Luukkaala          | University of Tampere, Tampere, Finland                                                            | FinnGen Teams | Trajectory                     |
| Iida Vähätalo            | University of Tampere, Tampere, Finland                                                            | FinnGen Teams | Trajectory                     |
| Jyrki Tammerluoto        | Institute for Molecular Medicine Finland (FIMM), HiLIFE, University of Helsinki, Helsinki, Finland | FinnGen Teams | Data protection officer        |



|                   |                                     |               |                                     |
|-------------------|-------------------------------------|---------------|-------------------------------------|
| Marco Hautalahti  | Finnish Biobank Cooperative - FINBB | FinnGen Teams | FINBB - Finnish biobank cooperative |
| Johanna Mäkelä    | Finnish Biobank Cooperative - FINBB | FinnGen Teams | FINBB - Finnish biobank cooperative |
| Sarah Smith       | Finnish Biobank Cooperative - FINBB | FinnGen Teams | FINBB - Finnish biobank cooperative |
| Tom Southerington | Finnish Biobank Cooperative - FINBB | FinnGen Teams | FINBB - Finnish biobank cooperative |
| Petri Lehto       | Finnish Biobank Cooperative - FINBB | FinnGen Teams | FINBB - Finnish biobank cooperative |
